# Supplementary material for: Cembranolides and Related Constituents from the Soft Coral Sarcophyton cinereum
Source: MDPI journal article supplement (doi:10.3390/molecules27061760), 2022-03-08
Supplement: s1 [file s1]

# Cembranolides and Related Constituents from the Soft Coral *Sarcophyton cinereum*

Chih-Hua Chao<sup>1,2,†</sup>, Yi-Ju Chen<sup>3,†</sup>, Chiung-Yao Huang<sup>3</sup>, Fang-Rong Chang<sup>4</sup>, Chang-Feng Dai<sup>5</sup> and Jyh-Horng Sheu<sup>3,4,6,\*</sup>

1. School of Pharmacy, China Medical University, Taichung 406040, Taiwan; chchao@mail.cmu.edu.tw (C.-H. C.)

2. Chinese Medicine Research and Development Center, China Medical University Hospital, Taichung 404332, Taiwan

3. Department of Marine Biotechnology and Resources, National Sun Yat-sen University, Kaohsiung 80424, Taiwan; yijuvivian@gmail.com (Y.-J. C.); huangcy@mail.nsysu.edu.tw (C.-Y.H.)

4. Graduate Institute of Natural Products, Kaohsiung Medical University, Kaohsiung 80708, Taiwan; aaronfrc@kmu.edu.tw (F.-R. C.)

5. Institute of Oceanography, National Taiwan University, Taipei 10617, Taiwan; corallab@ntu.edu.tw (C.-F.D.)

6. Department of Medical Research, China Medical University Hospital, China Medical University, Taichung 404332, Taiwan

\*Correspondence: sheu@mail.nsysu.edu.tw; Tel: +886-7-5252000 (ext. 5030); Fax: +886-7-5255020

† These authors contributed equally to this work

**Figure S1.** LR- and HR-ESIMS spectra of **1**.

**Figure S2.**  $^1\text{H}$  NMR spectrum of **1**.

**Figure S3.** Partial  $^1\text{H}$  NMR spectrum of **1**.

**Figure S4.**  $^{13}\text{C}$  NMR spectrum of **1**.

**Figure S5.** DEPT spectrum of **1**.

**Figure S6.** HSQC spectrum of **1**.

**Figure S7.** HMBC spectrum of **1**.

**Figure S8.** COSY spectrum of **1**.

**Figure S9.** NOESY spectrum of **1**.

**Figure S10.** LR- and HR-ESIMS spectra of **2**.

**Figure S11.**  $^1\text{H}$  NMR spectrum of **2**.

**Figure S12.**  $^{13}\text{C}$  NMR spectrum of **2**.

**Figure S13.** DEPT spectrum of **2**.

**Figure S14.** HSQC spectrum of **2**.

**Figure S15.** HMBC spectrum of **2**.

**Figure S16.** COSY spectrum of **2**.

**Figure S17.** NOESY spectrum of **2**.

**Figure S18.** LR- and HR-ESIMS spectra of **3**.

**Figure S19.**  $^1\text{H}$  NMR spectrum of **3**.

**Figure S20.**  $^{13}\text{C}$  NMR spectrum of **3**.

**Figure S21.** DEPT spectrum of **3**.

**Figure S22.** HSQC spectrum of **3**.

**Figure S23.** HMBC spectrum of **3**.

**Figure S24.** COSY spectrum of **3**.

**Figure S25.** NOESY spectrum of **3**.

**Table S1.** Comparison of NMR data between **2** and sartrolide D.

**Table S2.** DP4+ analysis table for compound **3** (isomer 1:  $1\alpha4\beta\text{-3}$ ; isomer 2:  $1\beta4\alpha\text{-3}$ ; isomer 3:  $1\alpha4\alpha\text{-3}$ ; isomer 4:  $1\beta4\beta\text{-3}$ ).

**Table S3.** Conformers and Boltzmann populations of  $1\alpha4\beta\text{-3}$ .

**Table S4.** Conformer and Boltzmann population of  $1\beta4\alpha\text{-3}$ .

**Table S5.** Conformers and Boltzmann populations of  $1\alpha4\alpha\text{-3}$ .

**Table S6.** Conformers and Boltzmann populations of  $1\beta4\beta\text{-3}$ .

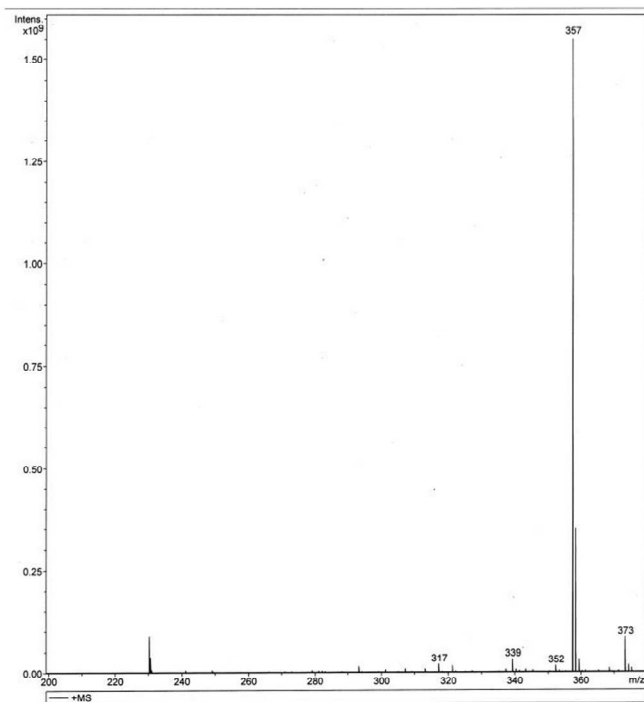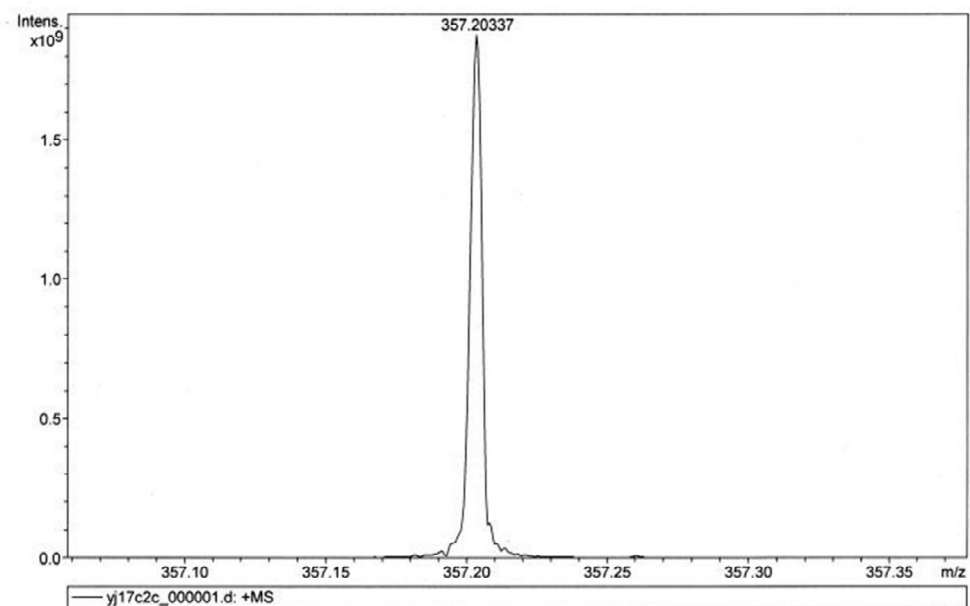

**Figure S1.** LR- and HR-ESIMS spectra of **1**.

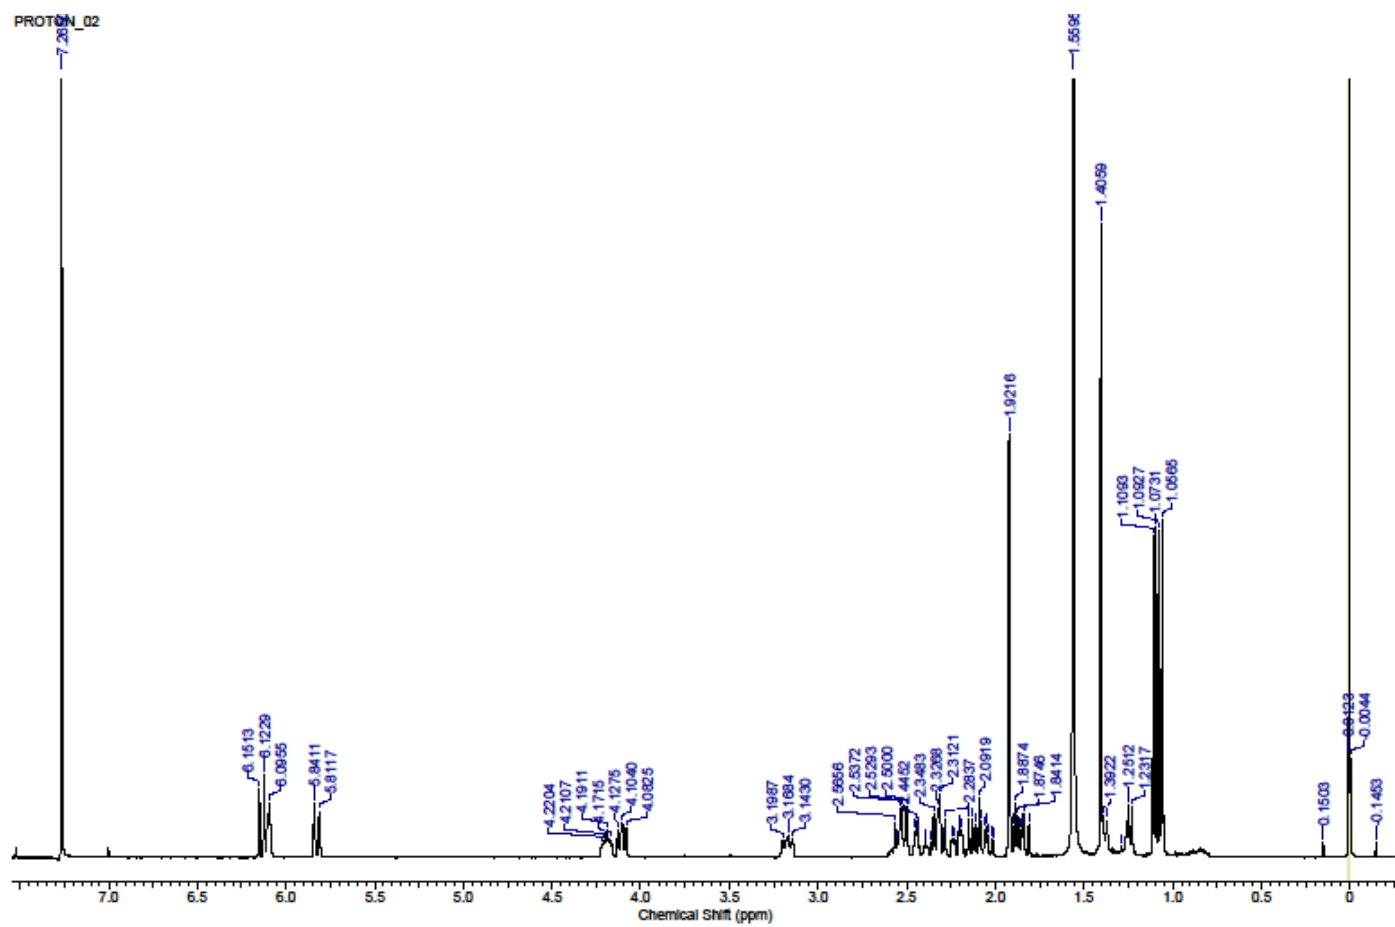

Figure S2.  $^1\text{H}$  NMR spectrum of **1**.

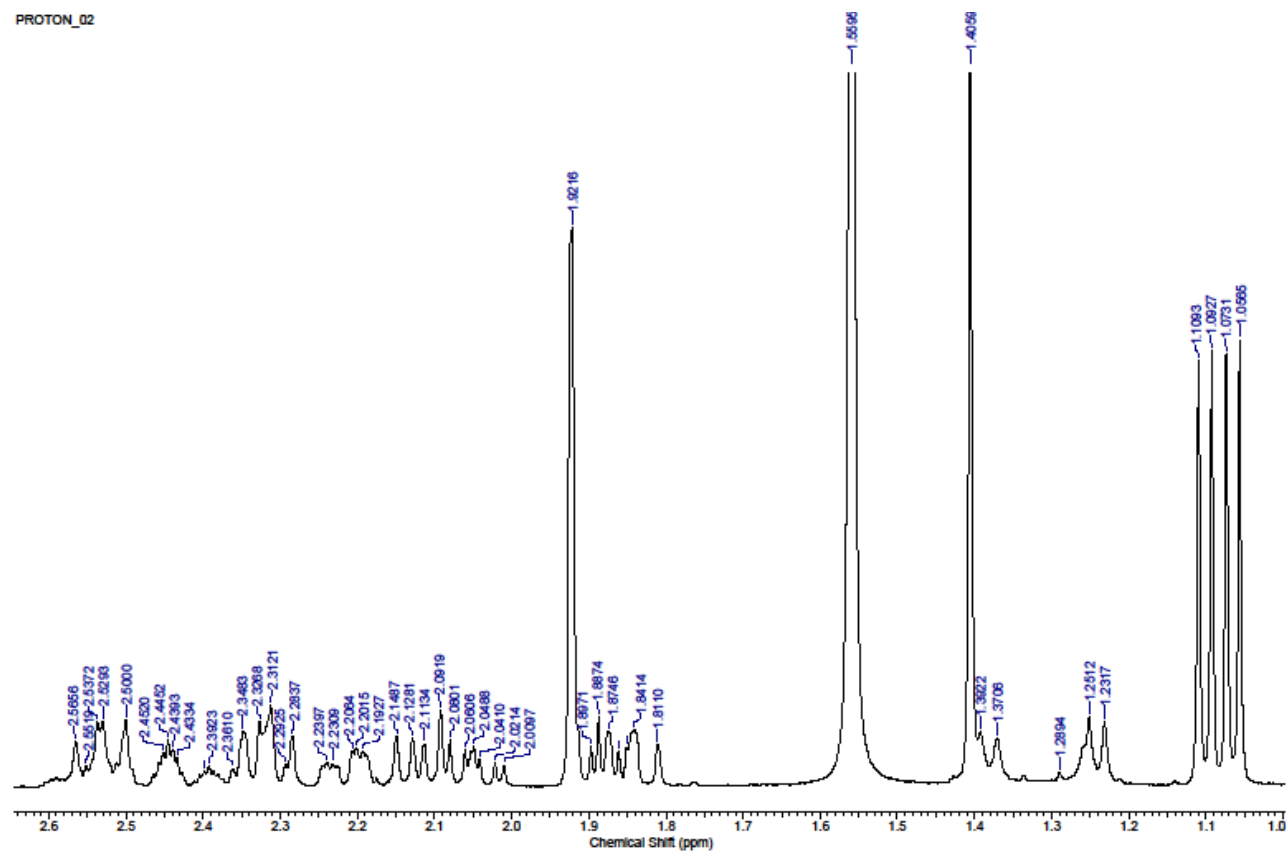

Figure S3. Partial  $^1\text{H}$  NMR spectrum of 1.

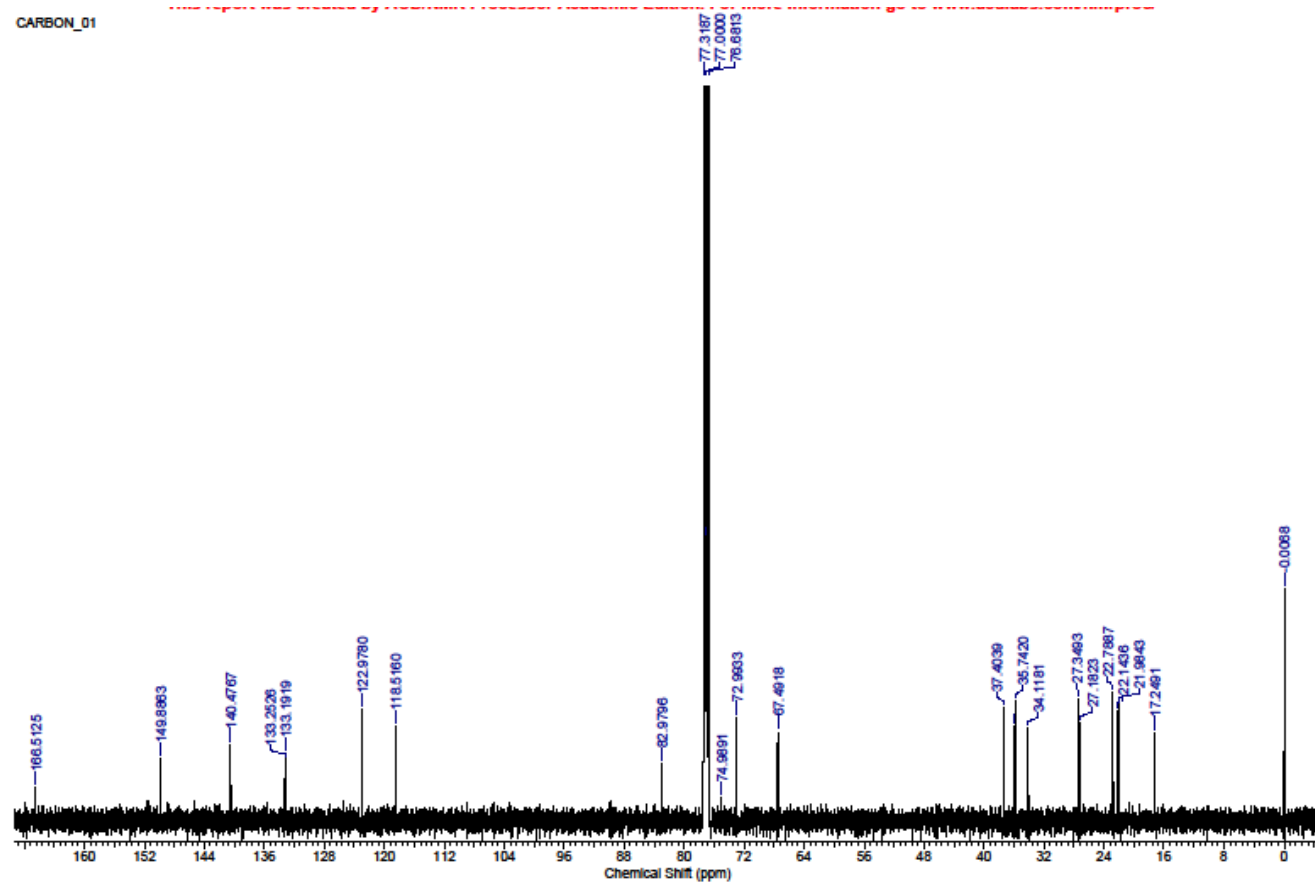

Figure S4.  $^{13}\text{C}$  NMR spectrum of 1.

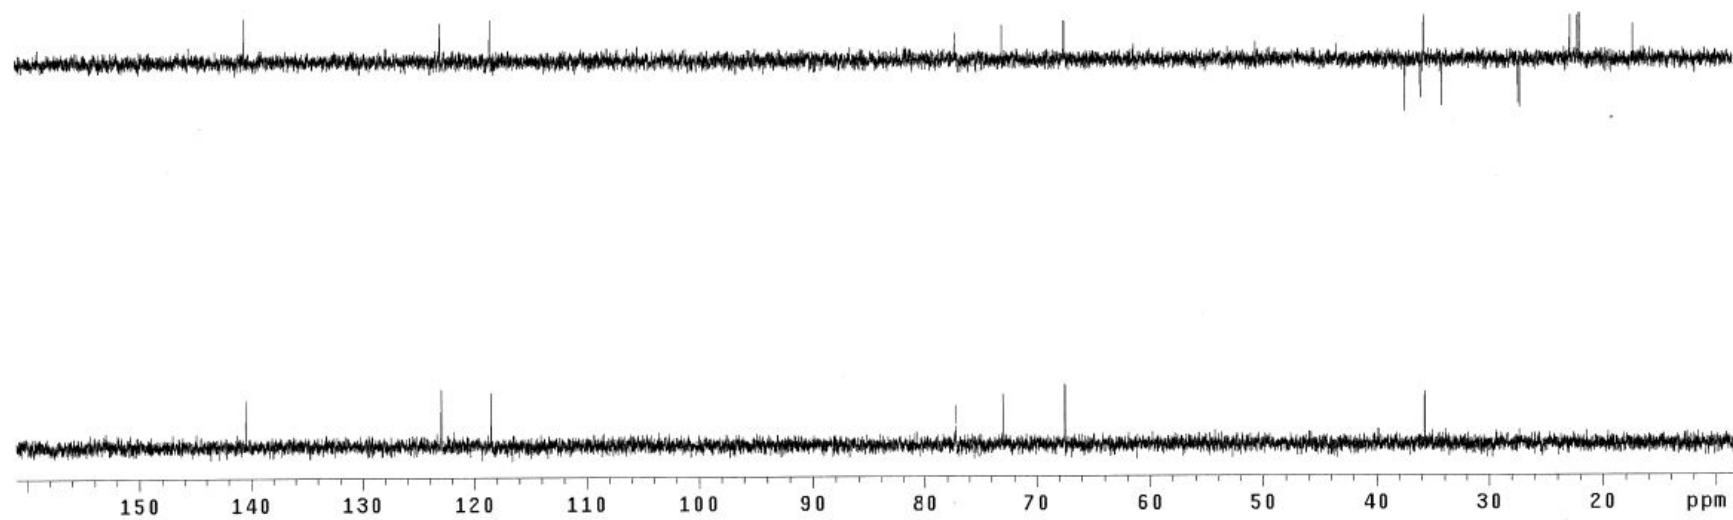

**Figure S5.** DEPT spectrum of **1**.

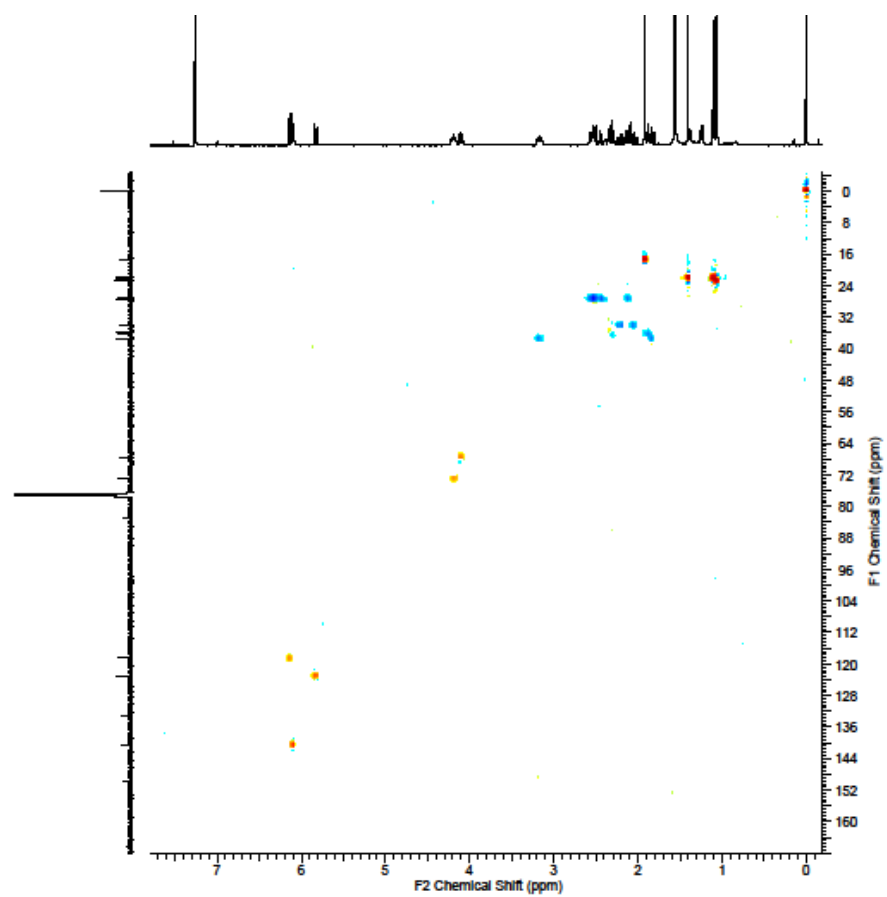

**Figure S6.** HSQC spectrum of **1**.



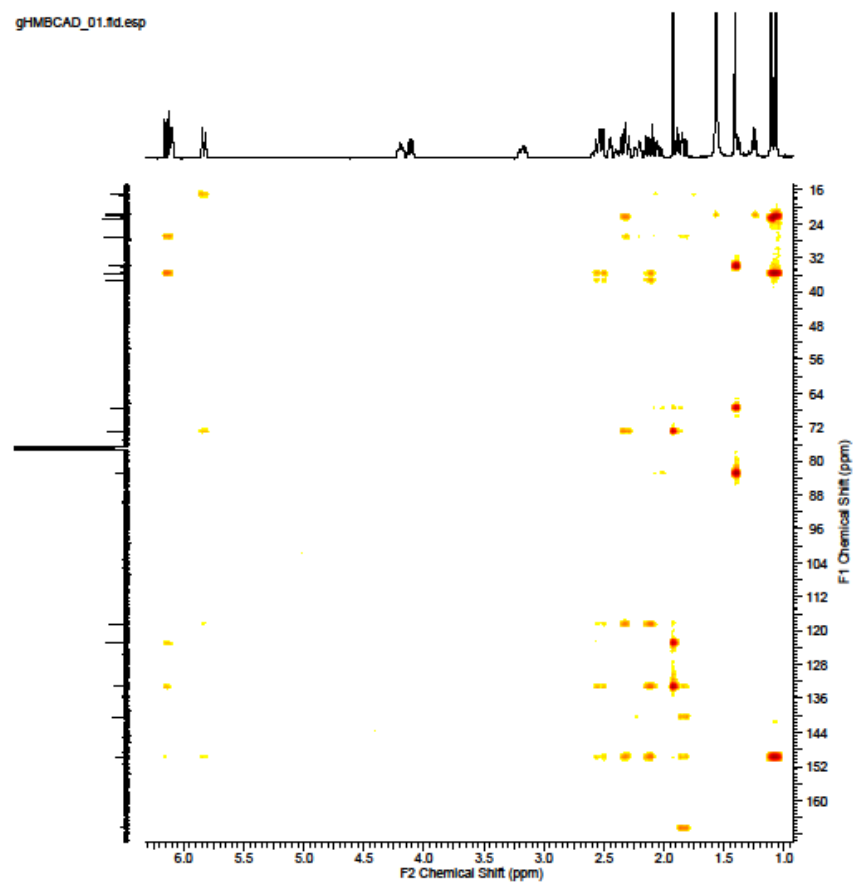

Figure S7. HMBC spectrum of 1.

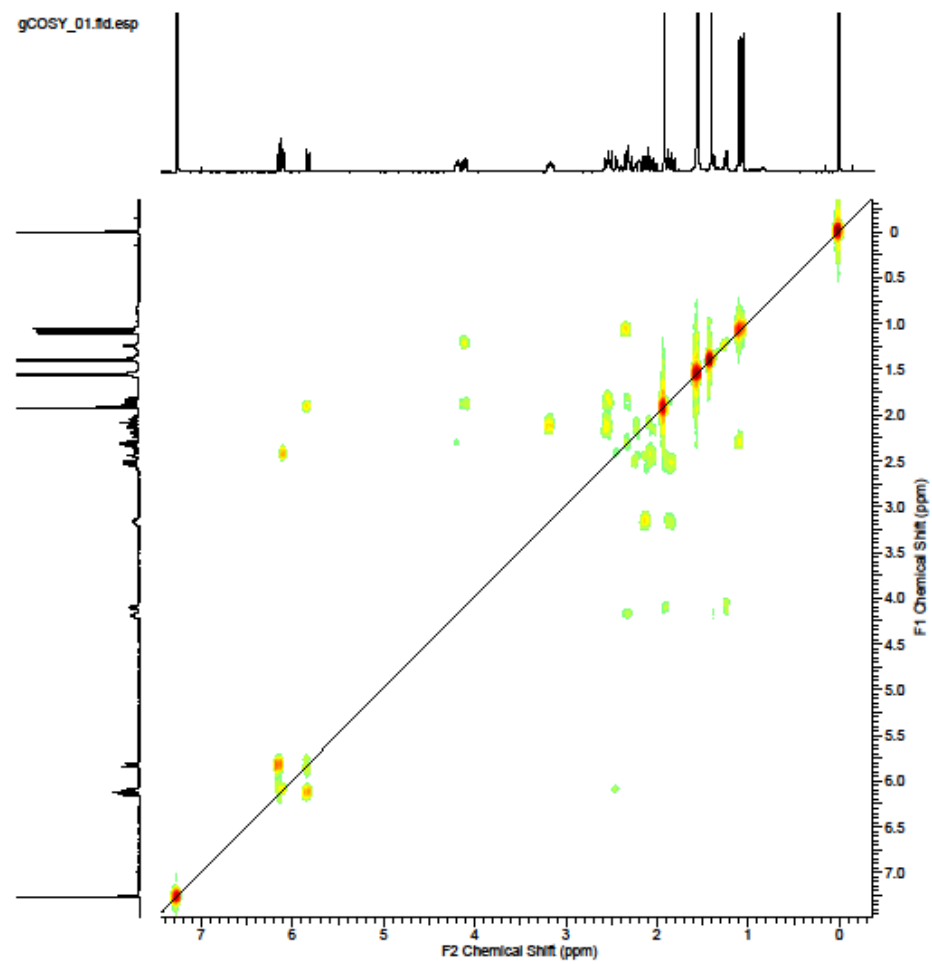

**Figure S8.** COSY spectrum of **1**.

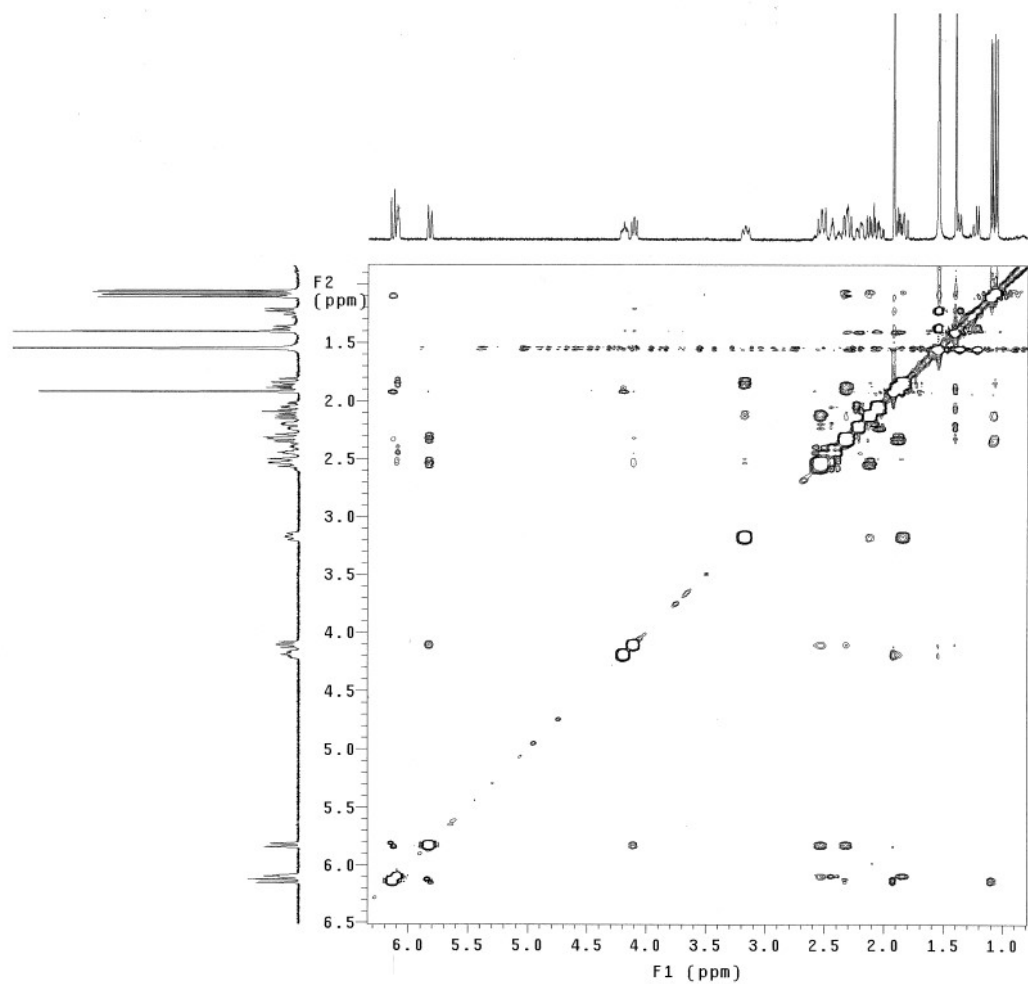

**Figure S9.** NOESY spectrum of **1**.

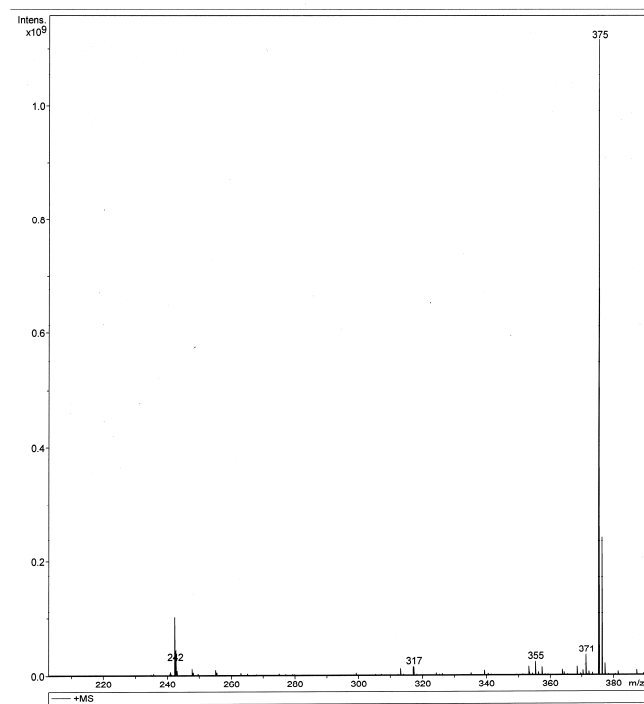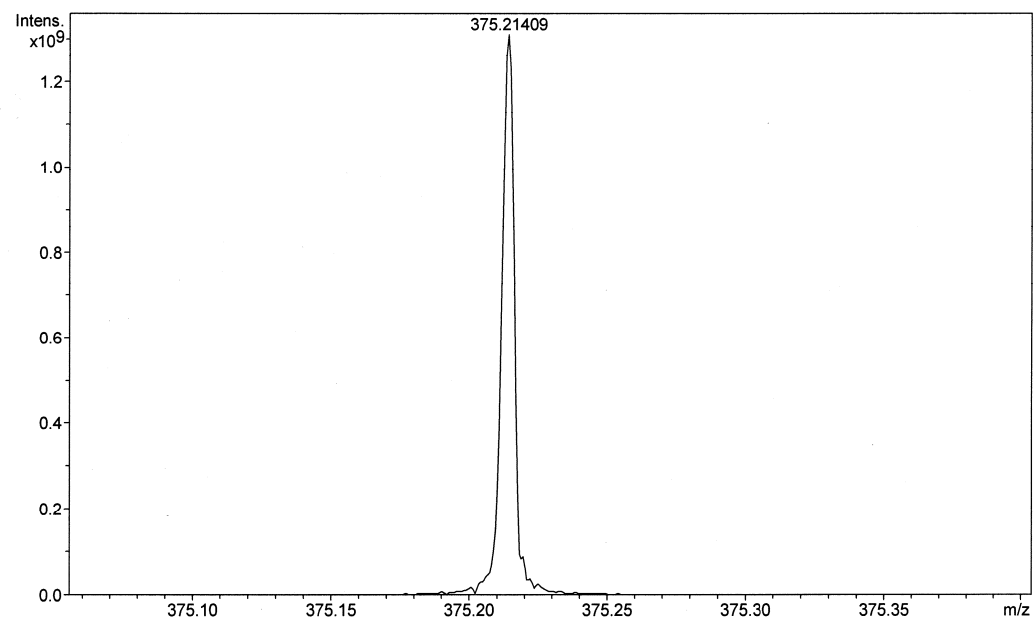

**Figure S10.** LR- and HR-ESIMS spectra of **2**.

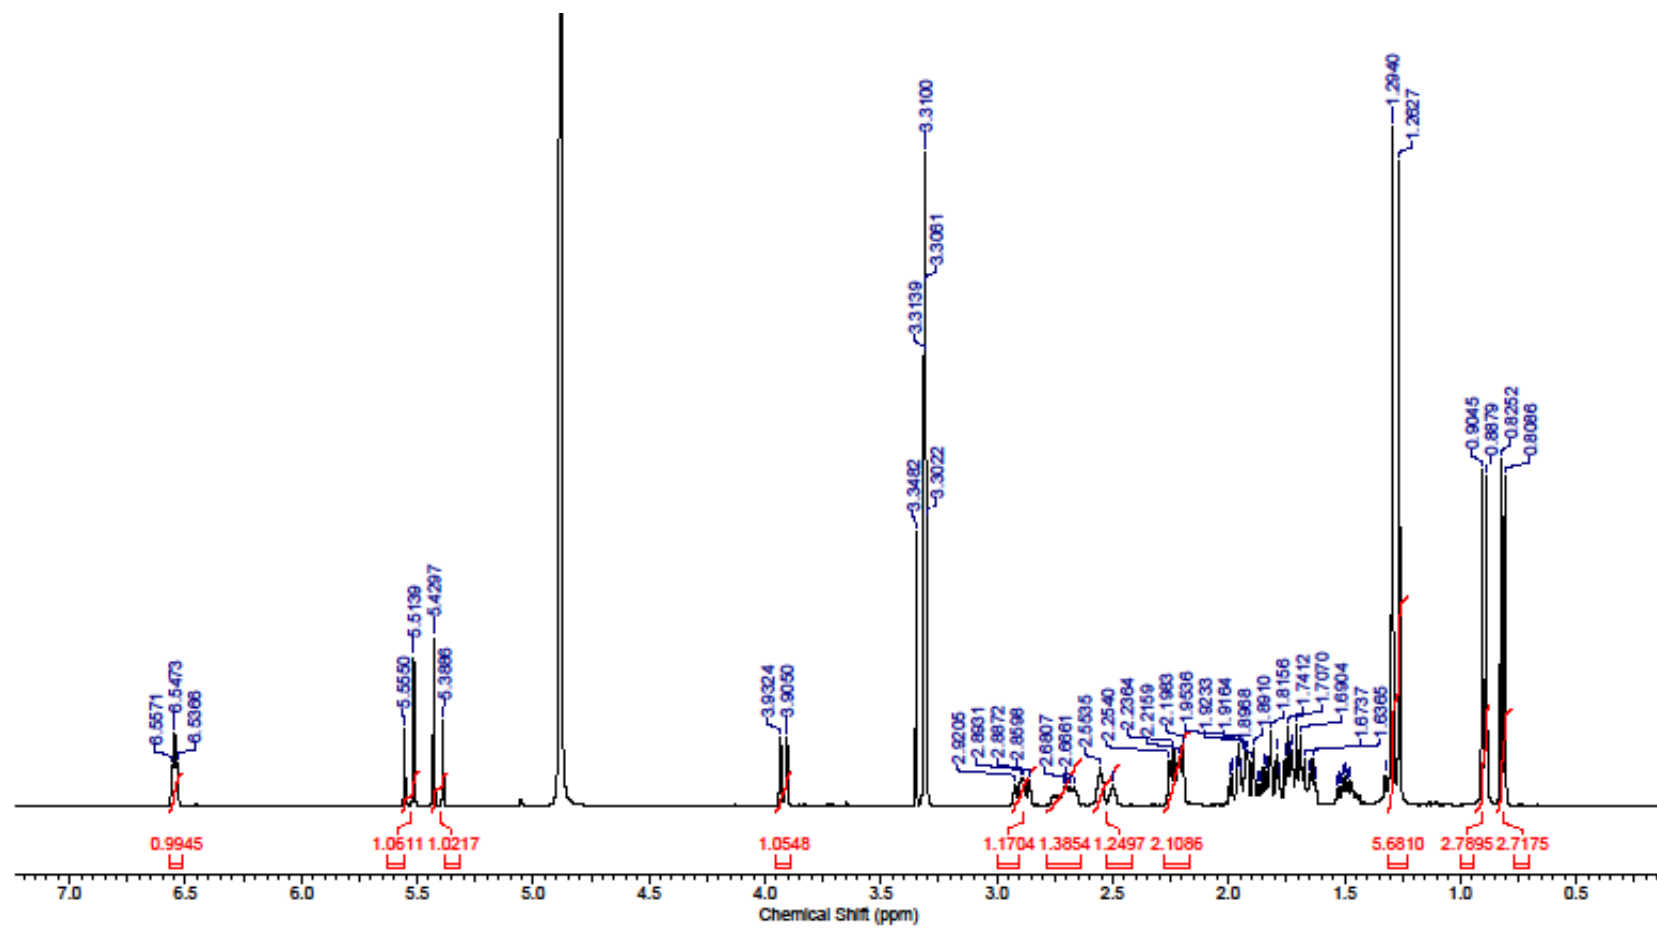

Figure S11. <sup>1</sup>H NMR spectrum of 2.

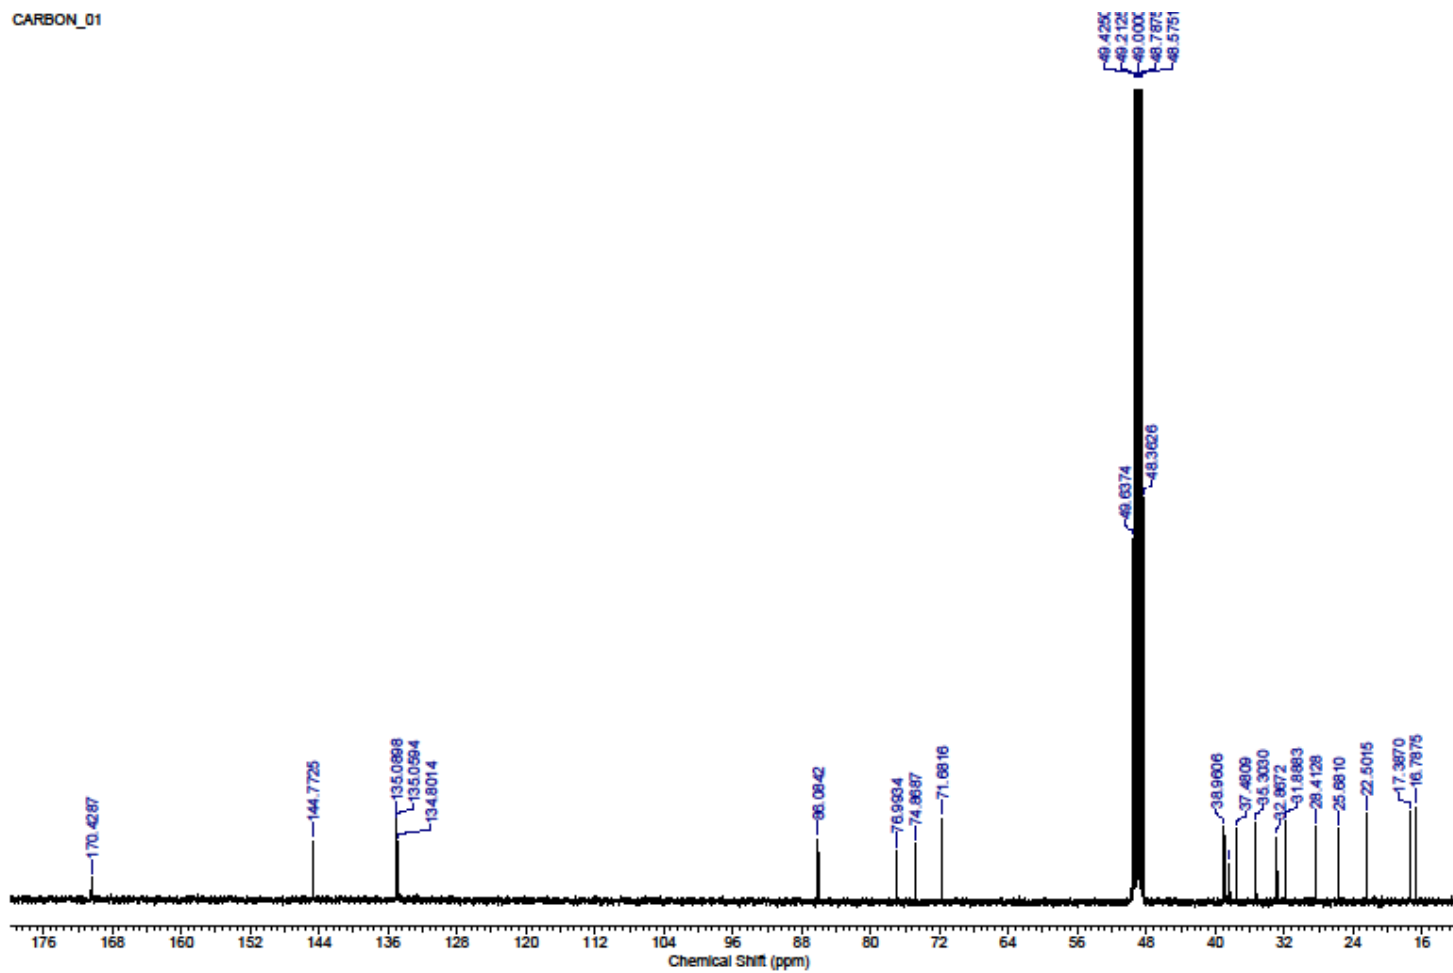

Figure S12.  $^{13}\text{C}$  NMR spectrum of **2**.

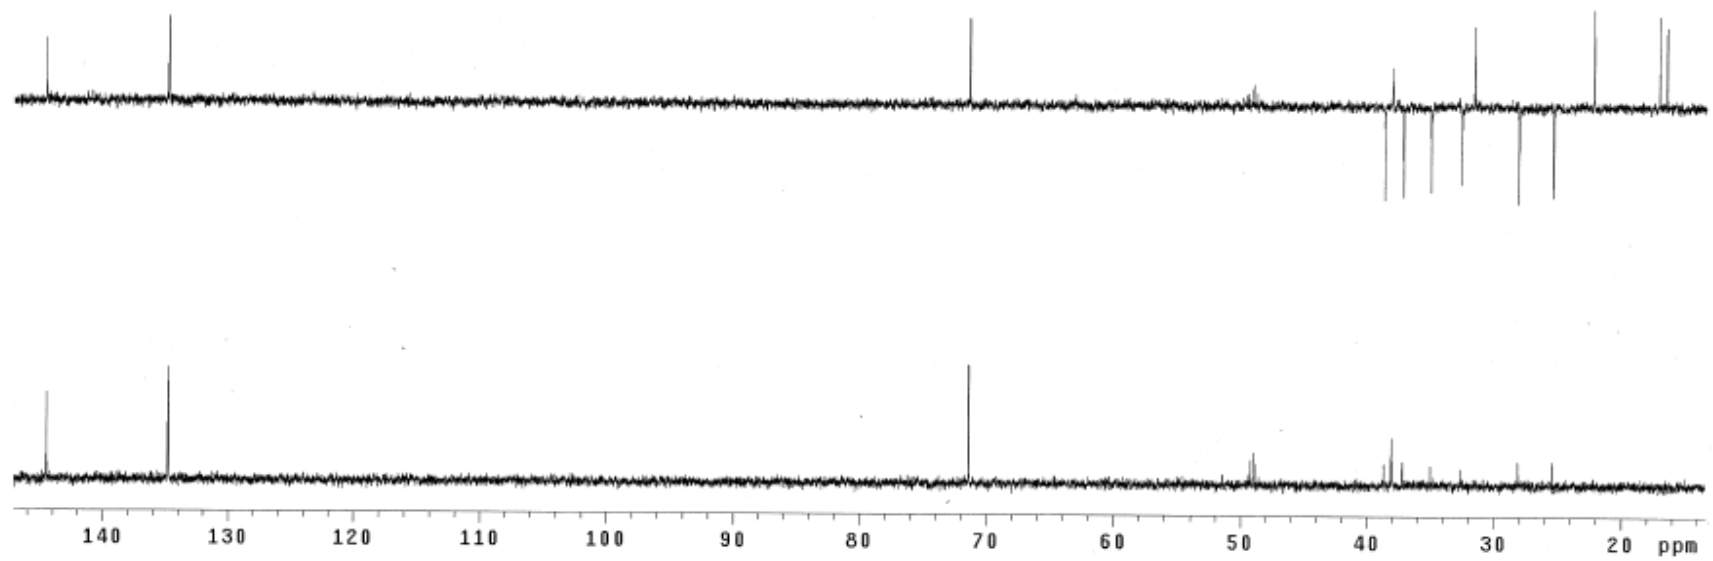

**Figure S13.** DEPT spectrum of **2**.

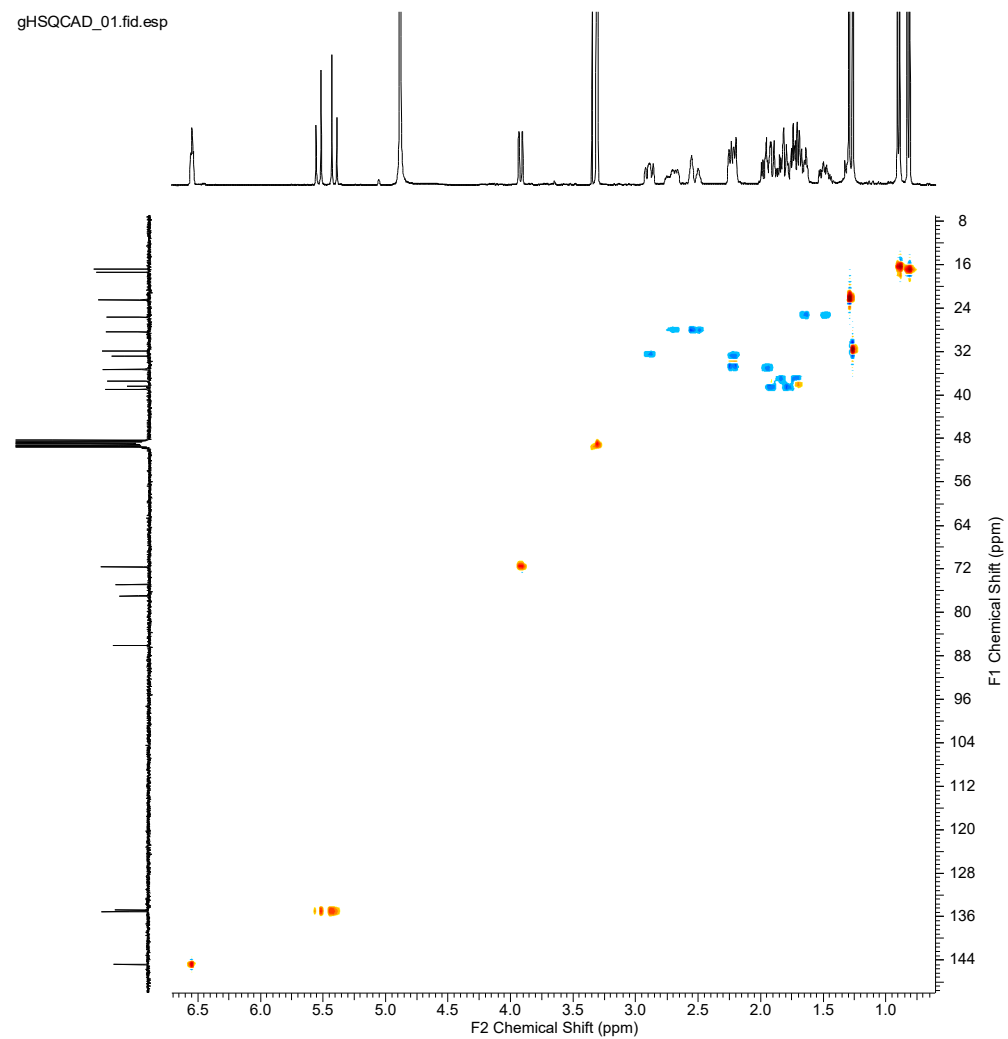

**Figure S14.** HSQC spectrum of **2**.



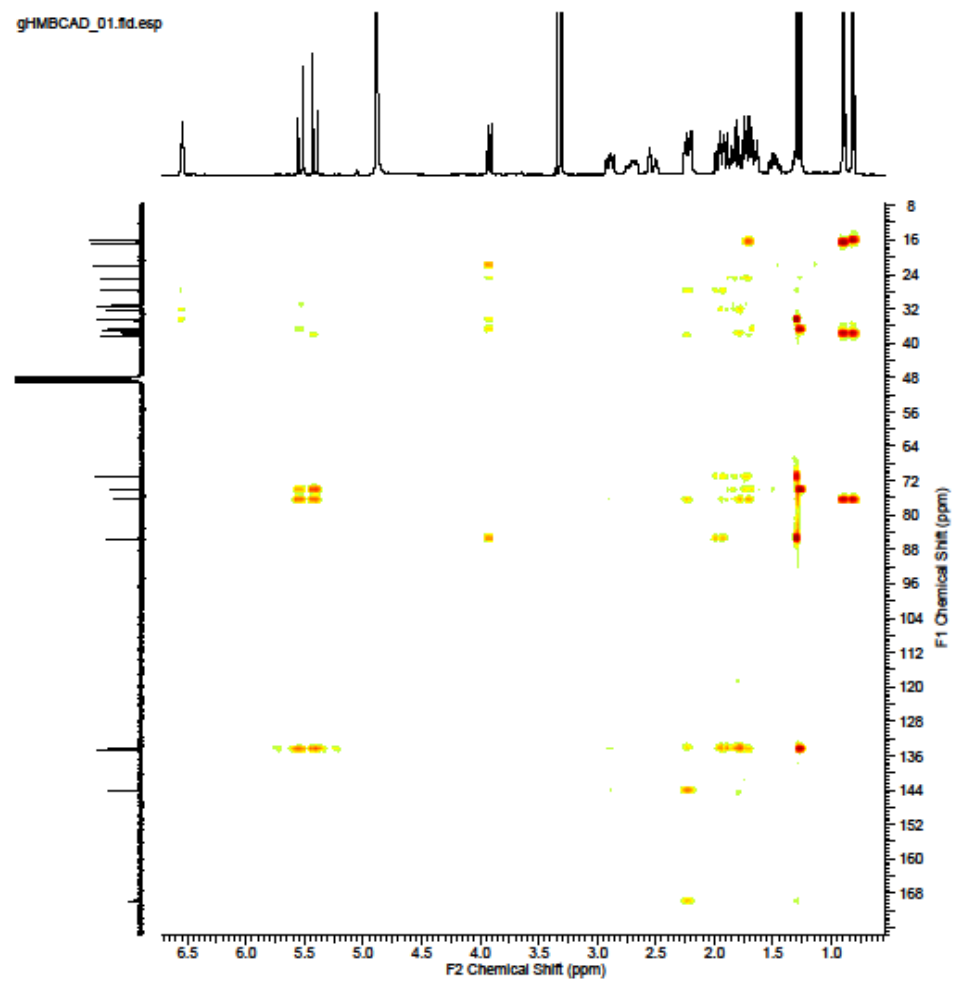

Figure S15. HMBC spectrum of 2.

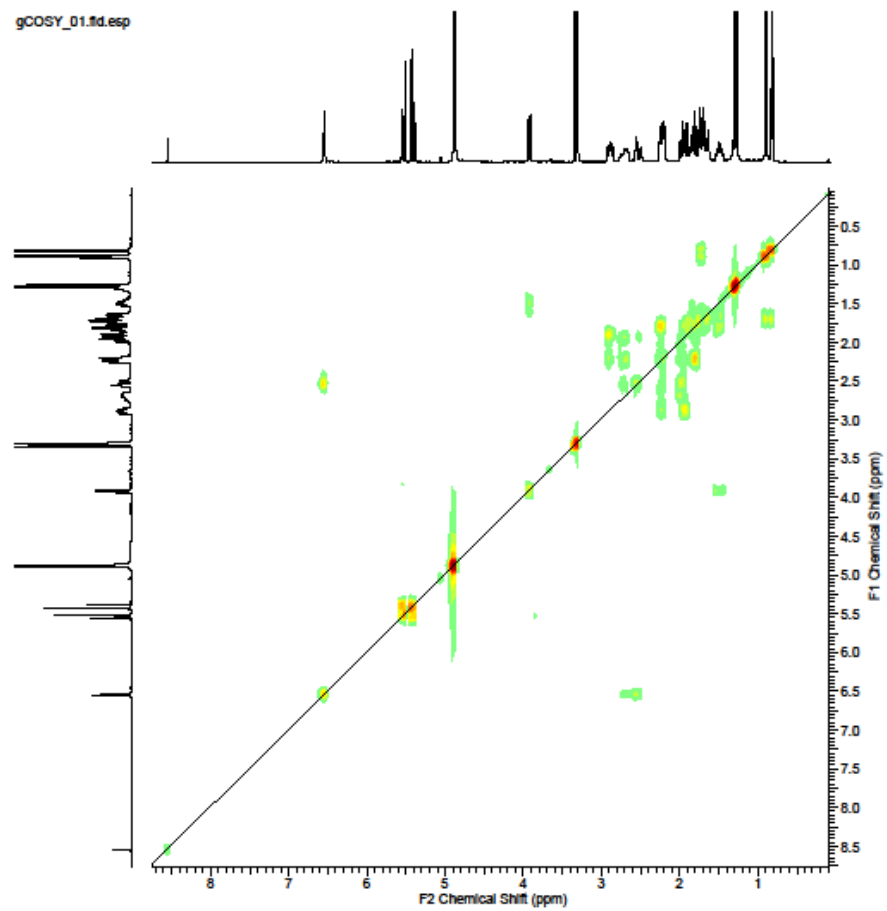

**Figure S16.** COSY spectrum of **2**.

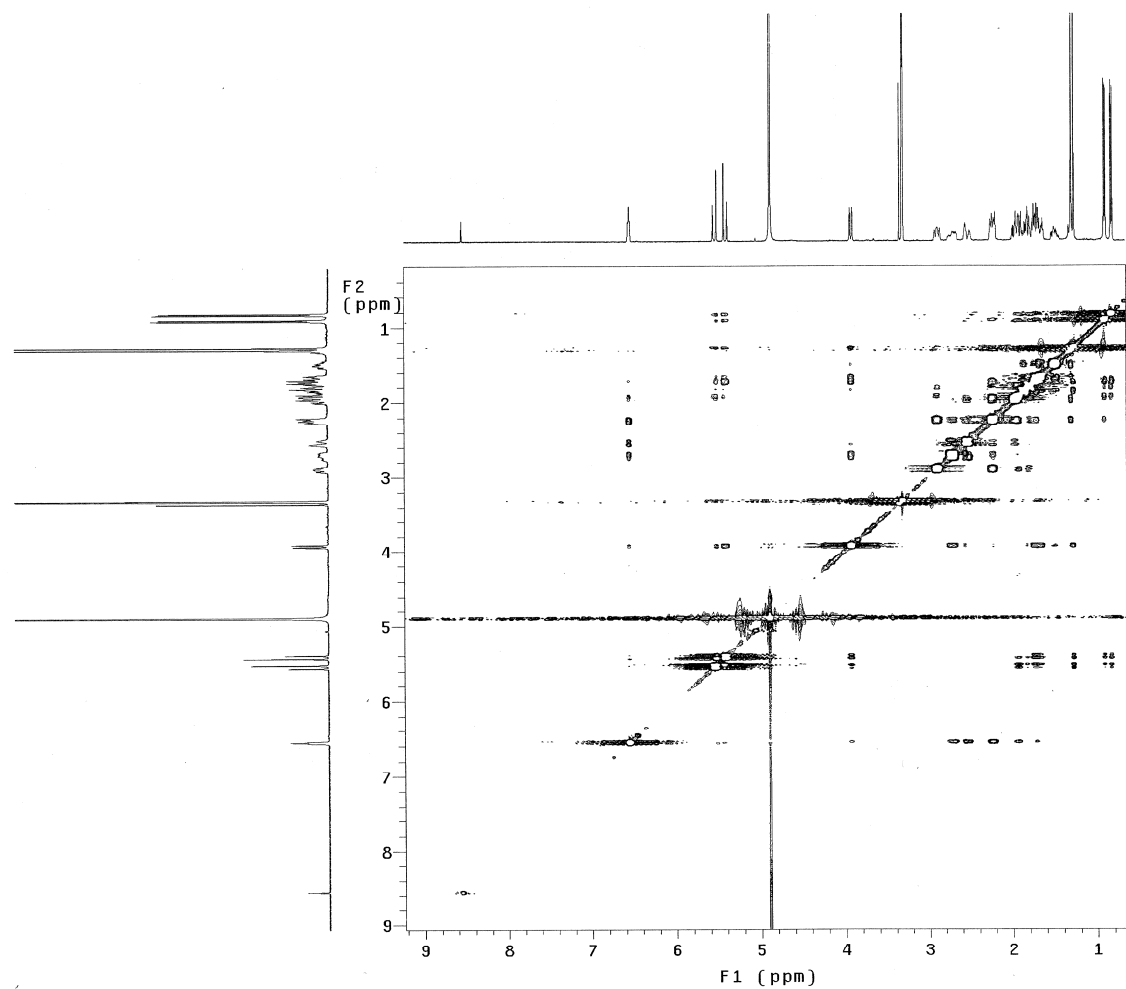

**Figure S17.** NOESY spectrum of **2**.

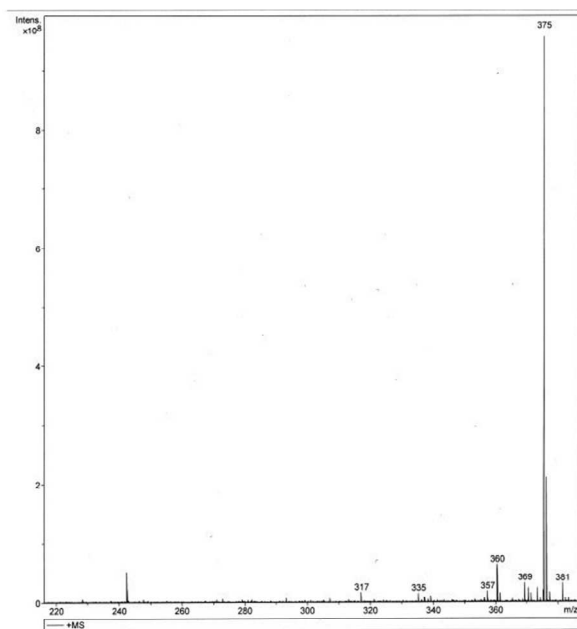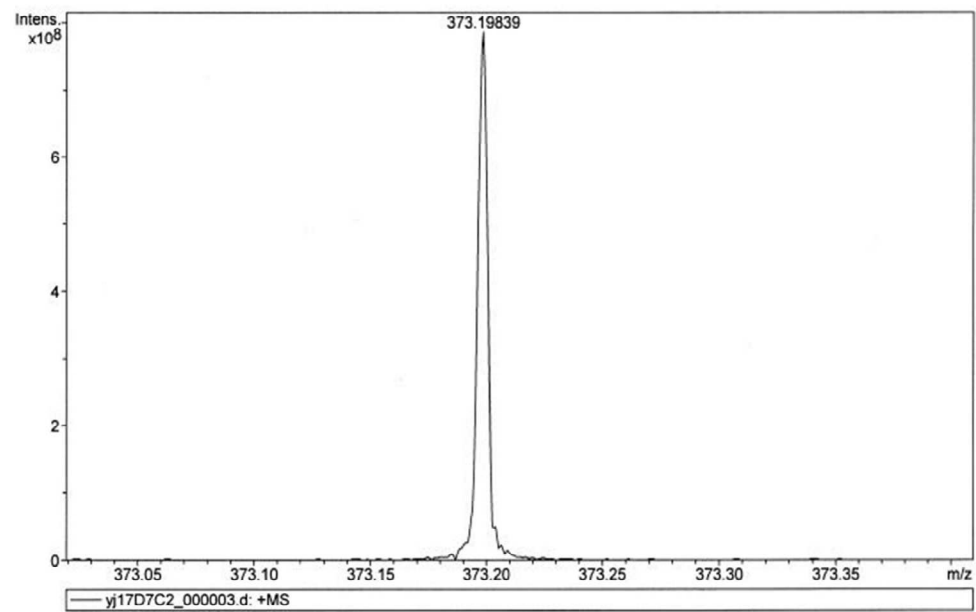

**Figure S18.** LR- and HR-ESIMS spectra of **3**.

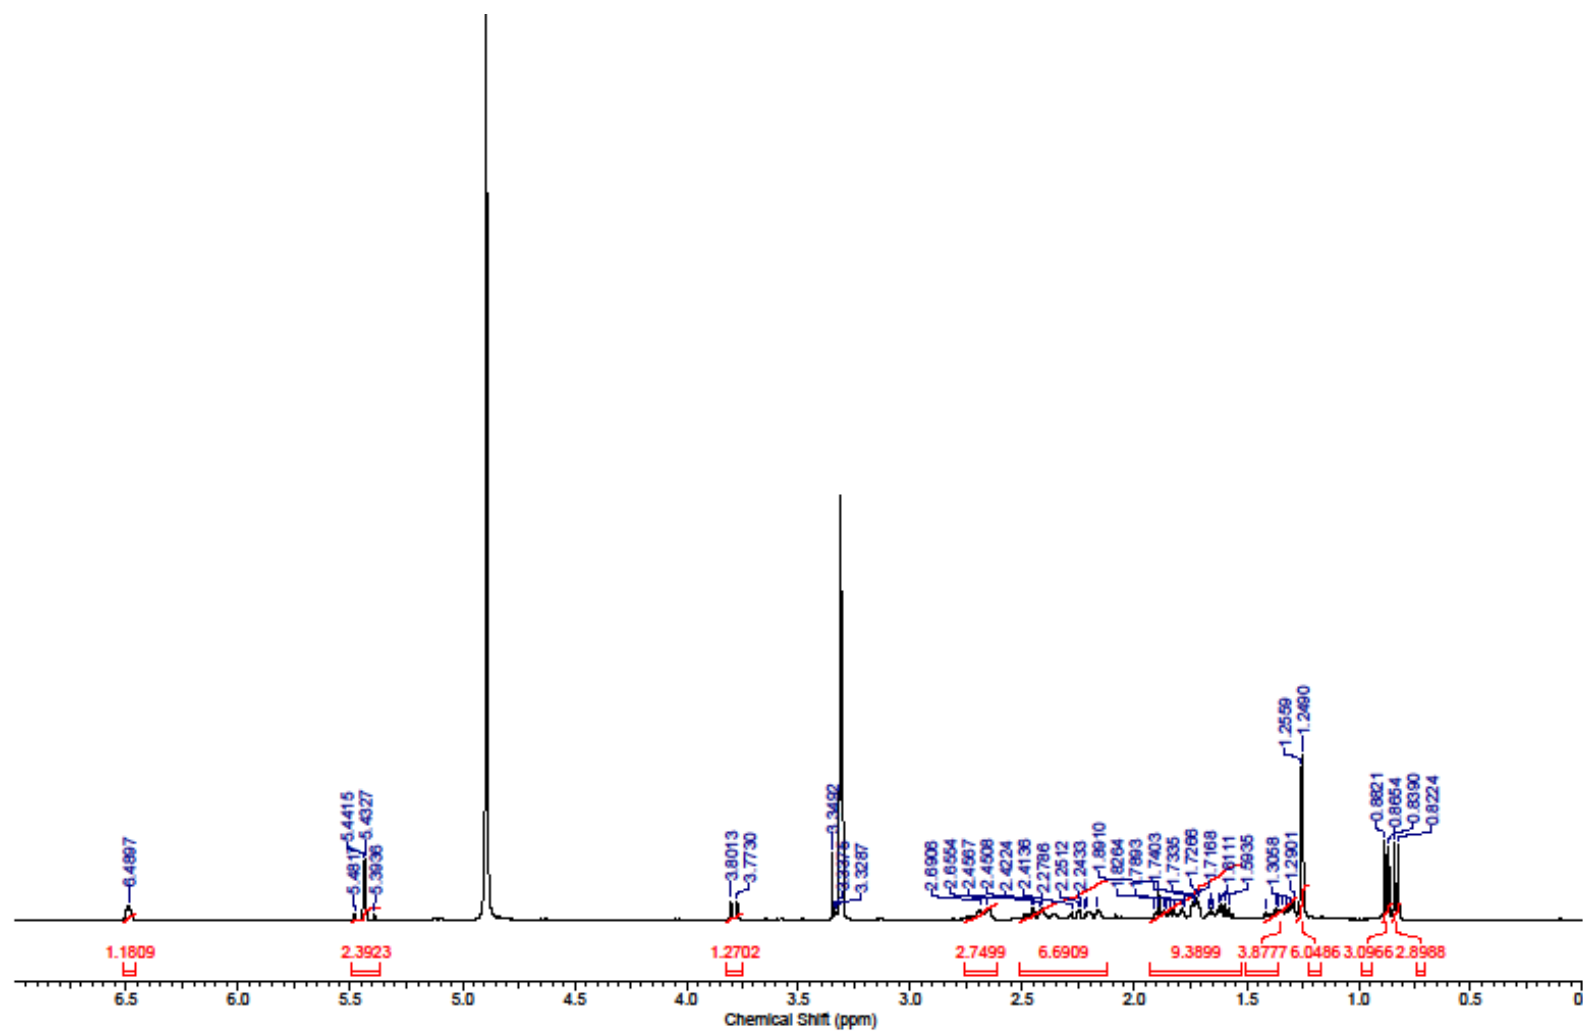

Figure S19. <sup>1</sup>H NMR spectrum of 3.

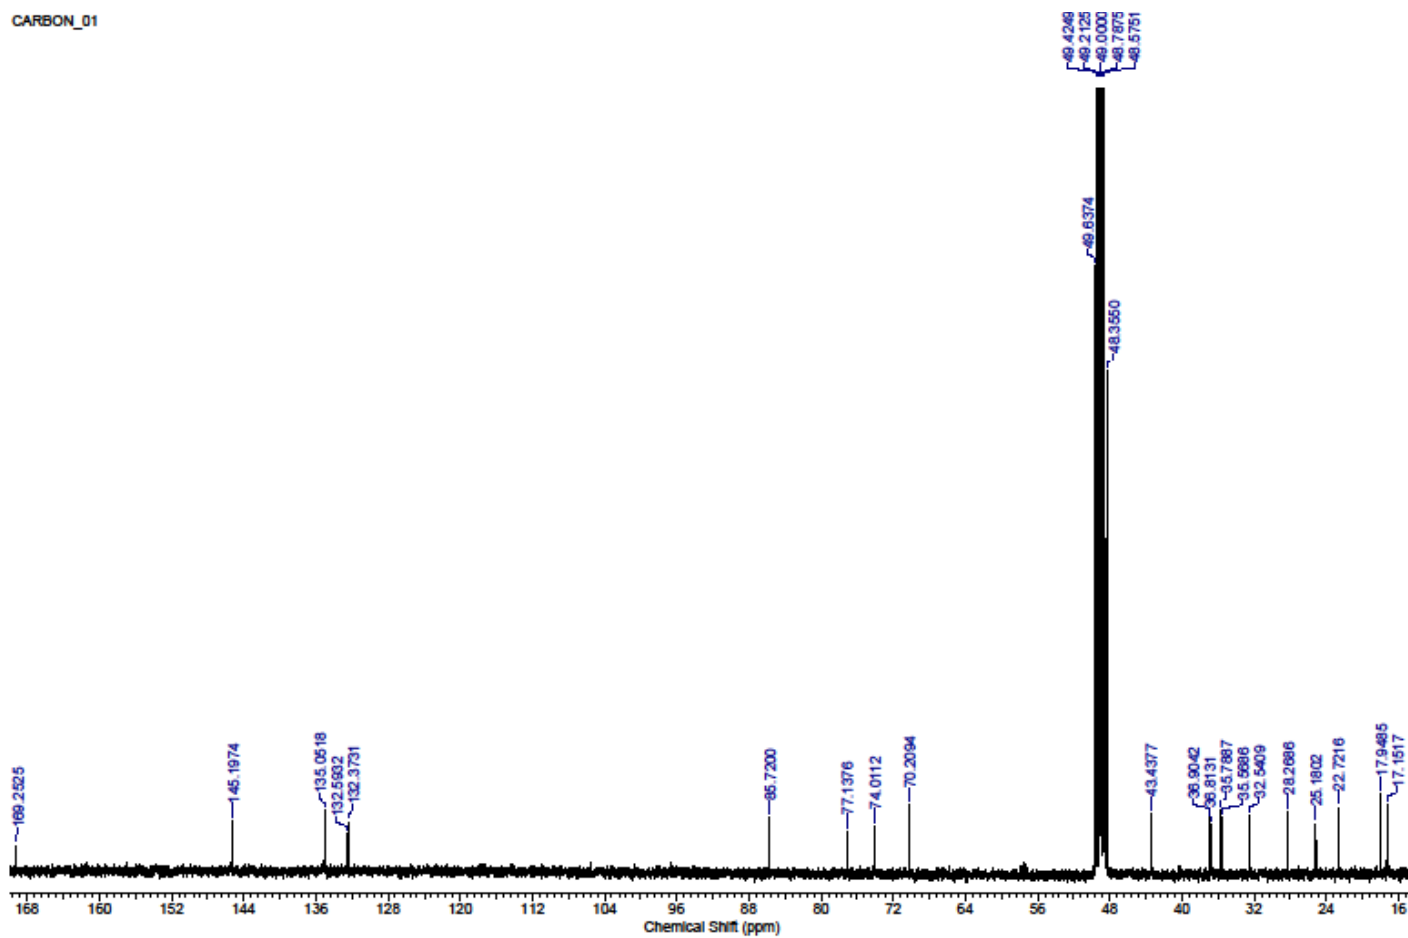

Figure S20.  $^{13}\text{C}$  NMR spectrum of **3**.

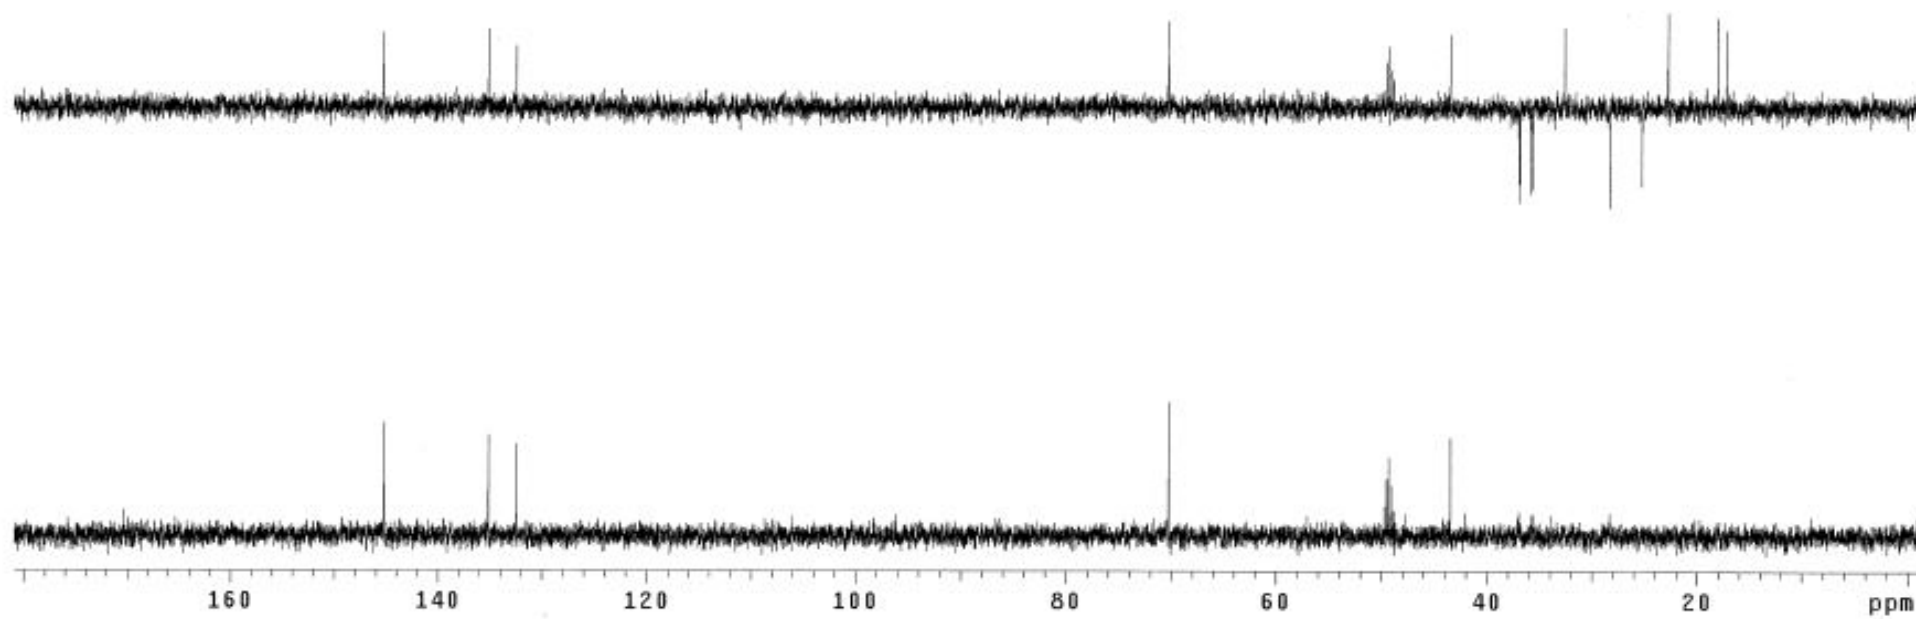

**Figure S21.** DEPT spectrum of **3**.

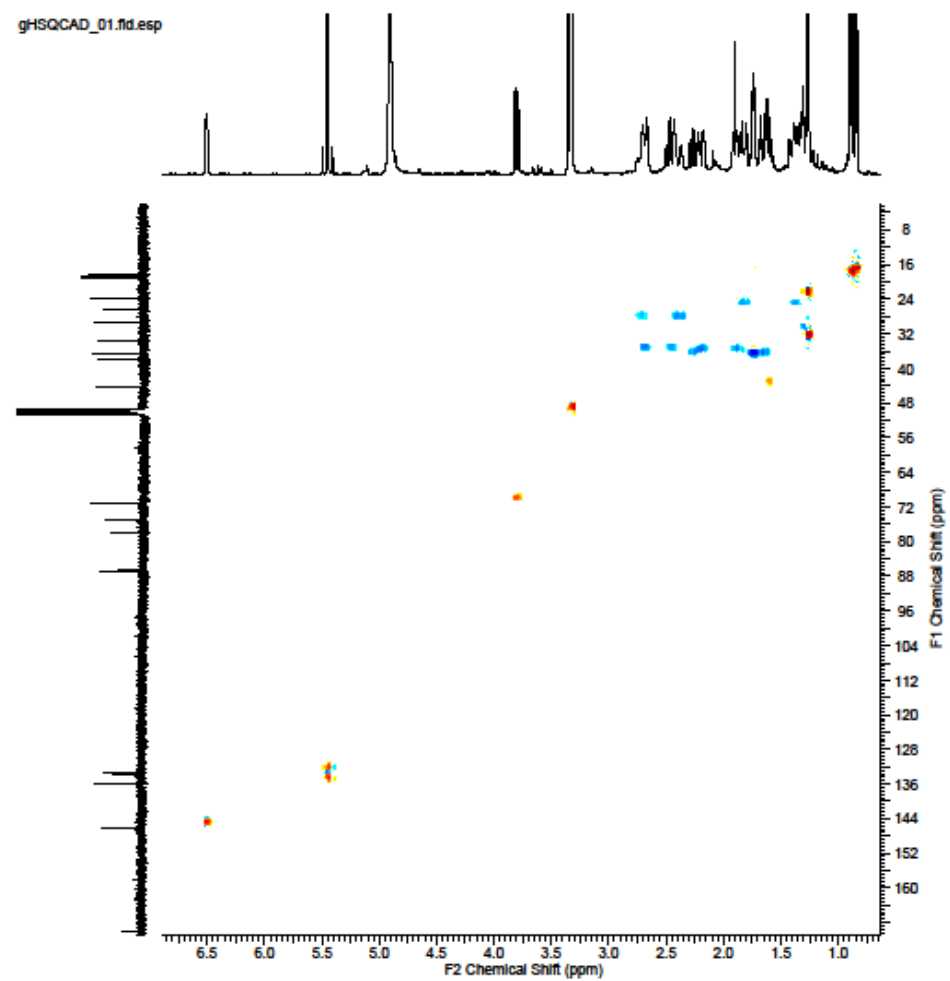

Figure S22. HSQC spectrum of **3**.



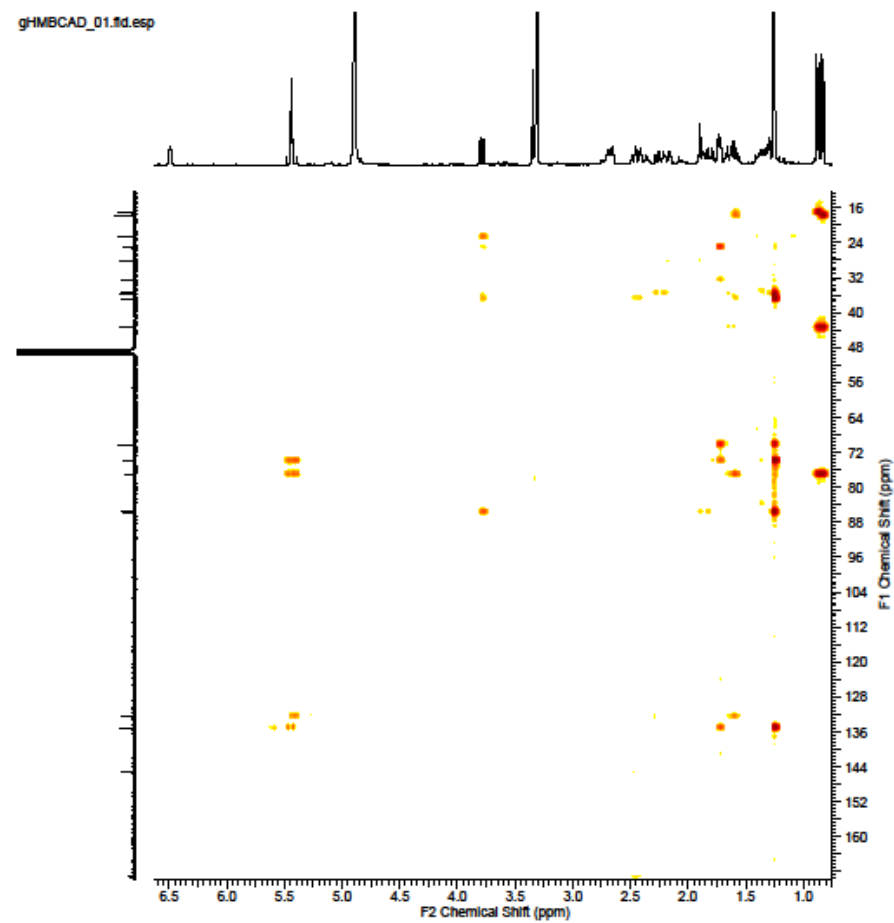

**Figure S23.** HMBC spectrum of **3**.

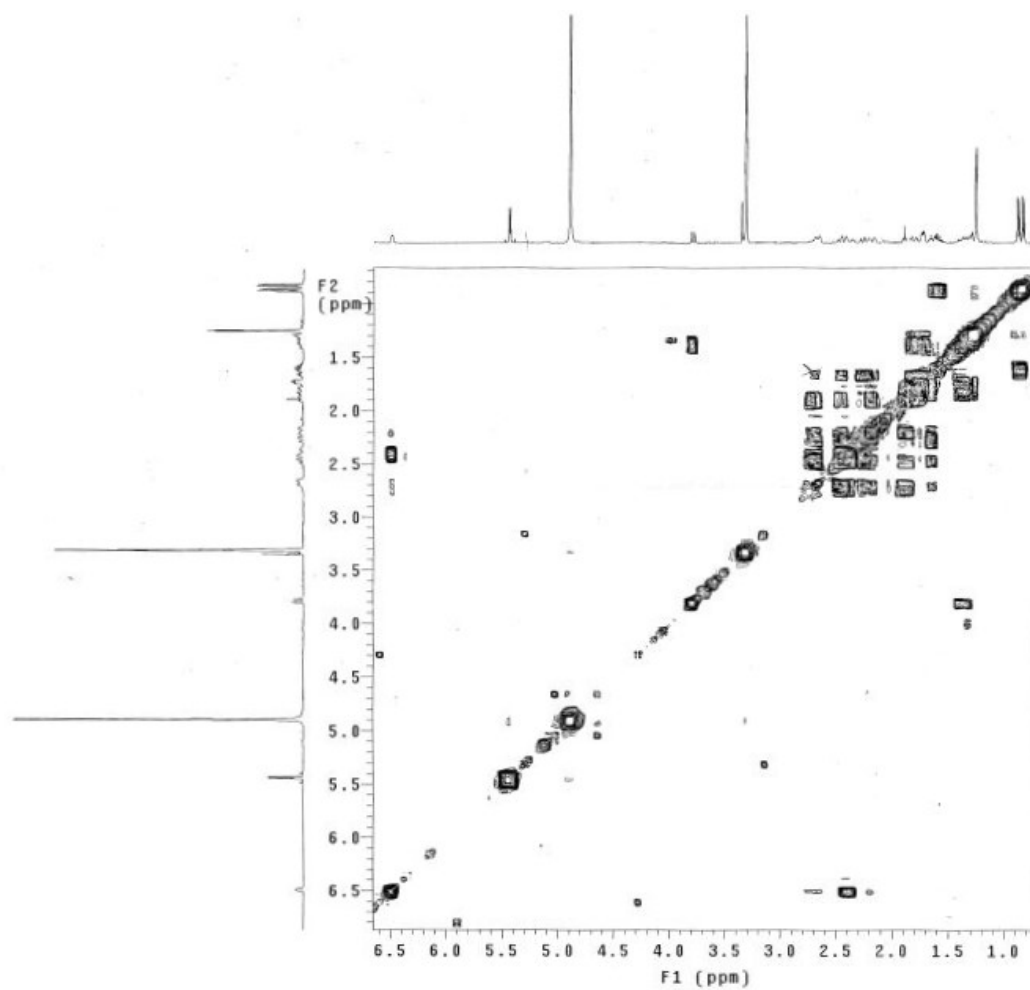

**Figure S24.** COSY spectrum of **3**.

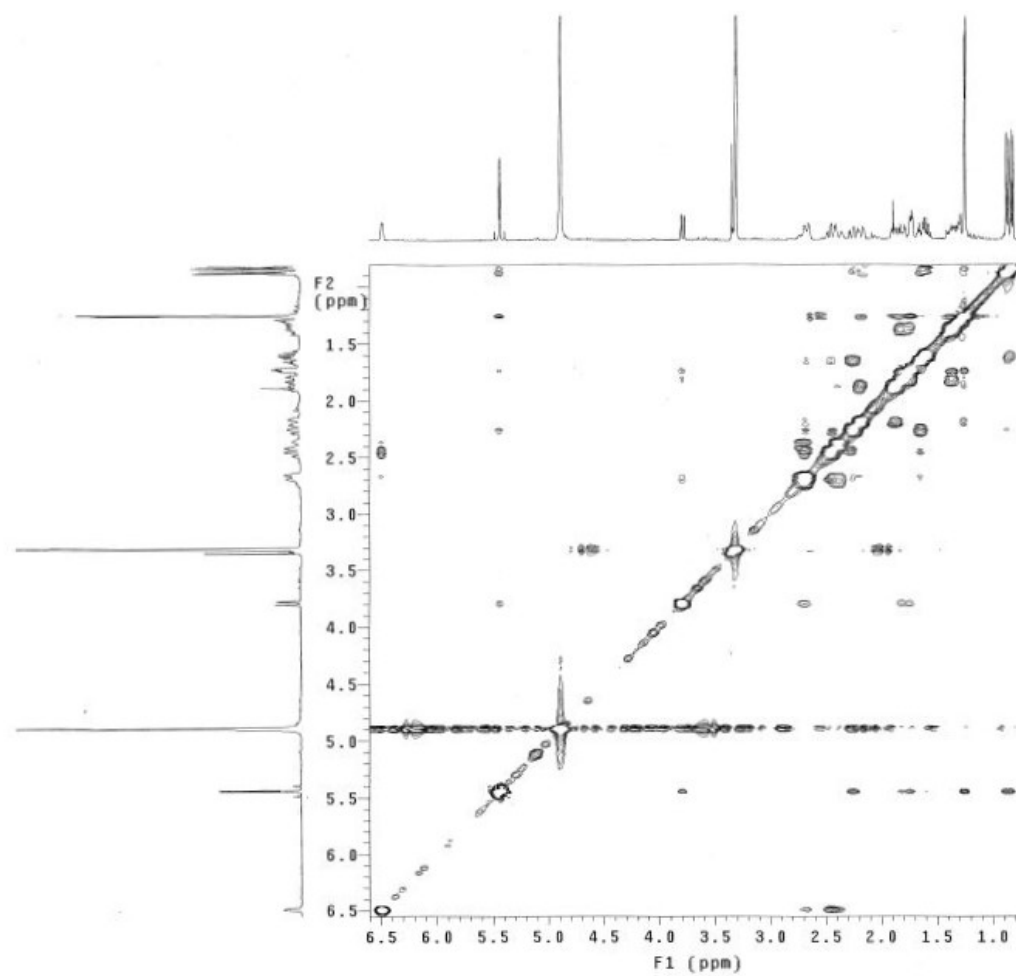

**Figure S25.** NOESY spectrum of **3**.

**Table S1.** Comparison of NMR data between **2** and sartrolide D.

| position | <sup>1</sup> H             |                            | <sup>13</sup> C         |                         |
|----------|----------------------------|----------------------------|-------------------------|-------------------------|
|          | <b>2</b> <sup>a</sup>      | sartrolide D               | <b>2</b> <sup>b</sup>   | sartrolide D            |
| 1        |                            |                            | 74.5 (C)                | 76.6 (C)                |
| 2        | 5.37 d (16.4) <sup>c</sup> | 5.56 d (16.6) <sup>c</sup> | 134.8 (CH) <sup>d</sup> | 134.0 (CH)              |
| 3        | 5.52 d (16.4)              | 5.39 d (16.6)              | 133.4 (CH)              | 132.9 (CH)              |
| 4        |                            |                            | 73.8 (C)                | 74.6 (C)                |
| 5a       | 1.98 m                     | 1.97 m                     | 34.0 (CH <sub>2</sub> ) | 34.2 (CH <sub>2</sub> ) |
| 5b       | 1.82 m                     | 1.74 m                     |                         |                         |
| 6        | 1.66 m                     | 1.54 m                     | 25.6 (CH <sub>2</sub> ) | 25.4 (CH <sub>2</sub> ) |
| 7        | 3.75 d (10.0)              | 4.44 dd (10.8, 3.5)        | 72.2 (CH)               | 72.7 (CH)               |
| 8        |                            |                            | 83.9 (C)                | 83.1 (C)                |
| 9a       | 2.23 m                     | 2.22 m                     | 36.6 (CH <sub>2</sub> ) | 34.7 (CH <sub>2</sub> ) |
| 9b       | 2.00 m                     | 2.01 m                     |                         |                         |
| 10a      | 2.53 m                     | 2.57 m                     | 27.6 (CH <sub>2</sub> ) | 27.6 (CH <sub>2</sub> ) |
| 10b      | 2.50 m                     | 2.43 m                     |                         |                         |
| 11       | 6.51 t (5)                 | 6.41 t (4.1)               | 144.0 (CH)              | 141.4 (CH)              |
| 12       |                            |                            | 134.2 (C)               | 133.6 (C)               |
| 13a      | 3.09 m                     | 2.86 m                     | 32.0 (CH <sub>2</sub> ) | 32.4 (CH <sub>2</sub> ) |
| 13b      | 2.50 m                     | 2.51 m                     |                         |                         |
| 14a      | 1.90 m                     | 1.89 m                     | 38.0 (CH <sub>2</sub> ) | 37.5 (CH <sub>2</sub> ) |
| 14b      | 1.81 m                     | 1.81 m                     |                         |                         |
| 15       | 1.80 m                     | 1.78 m                     | 40.1 (CH)               | 38.5 (CH)               |
| 16       | 0.80 d (6.8)               | 0.87 d (6.8)               | 16.7 (CH <sub>3</sub> ) | 16.8 (CH <sub>3</sub> ) |
| 17       | 0.85d (6.8)                | 0.90 d (6.8)               | 16.9 (CH <sub>3</sub> ) | 17.4 (CH <sub>3</sub> ) |
| 18       | 1.30 s                     | 1.31 s                     | 32.0 (CH <sub>3</sub> ) | 33.1 (CH <sub>3</sub> ) |
| 19       | 1.31 s                     | 1.32 s                     | 21.7 (CH <sub>3</sub> ) | 21.7 (CH <sub>3</sub> ) |
| 20       |                            |                            | 168.7 (C)               | 167.1 (C)               |

<sup>a</sup> Spectra recorded at 500 MHz in CDCl<sub>3</sub>.<sup>b</sup> Spectra recorded at 100 MHz in CDCl<sub>3</sub>.<sup>c</sup> *J* values (in Hz) in parentheses.<sup>d</sup> Attached protons were deduced by DEPT experiments.

**Table S2.** DP4+ analysis table for compound **3** (isomer 1: 1 $\alpha$ 4 $\beta$ -**3**; isomer 2: 1 $\beta$ 4 $\alpha$ -**3**; isomer 3: 1 $\alpha$ 4 $\alpha$ -**3**; isomer 4: 1 $\beta$ 4 $\beta$ -**3**).

|    | A          | B    | C                     | D       | E              | F            | G                | H                  | I      | J        | K       |
|----|------------|------|-----------------------|---------|----------------|--------------|------------------|--------------------|--------|----------|---------|
| 1  | Settings   |      | Type of data (shifts) |         |                |              |                  | TMS 1H             | 31.560 | TMS 13C  | 196.609 |
| 2  | Default    |      | Shielding tensors     |         |                |              |                  | Default            | $\mu$  | $\sigma$ | $\nu$   |
| 3  |            |      |                       |         |                |              |                  | 13C $\alpha$ ,sp2  | -0.920 | 1.748    | 5.364   |
| 4  |            |      |                       |         |                |              |                  | 13C $\alpha$ ,sp3  | 2.909  | 1.600    | 6.269   |
| 5  | Functional |      | Solvent?              |         | Basis Set      |              |                  | 1H $\alpha$ ,sp2   | 0.347  | 0.118    | 4.911   |
| 6  | mPW1PW91   |      | PCM                   |         | 6-31+G(d,p)    |              |                  | 1H $\alpha$ ,sp3   | -0.018 | 0.112    | 3.651   |
| 7  |            |      |                       |         |                |              |                  | 13Cs               | -      | 1.557    | 6.227   |
| 8  |            |      |                       |         |                |              |                  | 1Hs                | -      | 0.104    | 3.893   |
| 9  | Isomer N°  |      |                       | 1       | 2              | 3            | 4                | 5                  | 6      | 7        | 8       |
| 10 | DP4+ (%)   |      | H data                | 100.00% | 0.00%          | 0.00%        | 0.00%            | -                  | -      | -        | -       |
| 11 |            |      | C data                | 100.00% | 0.00%          | 0.00%        | 0.00%            | -                  | -      | -        | -       |
| 12 |            |      | All data              | 100.00% | 0.00%          | 0.00%        | 0.00%            | -                  | -      | -        | -       |
| 13 | Type       | sp2? | Exp                   | 1       | 2              | 3            | 4                | 5                  | 6      | 7        | 8       |
| 14 | H          | x    | 5.44                  | 25.7084 | 25.9003        | 25.7253      | 25.9193          |                    |        |          |         |
| 15 | H          | x    | 5.43                  | 25.3996 | 25.4056        | 25.701       | 25.7719          |                    |        |          |         |
| 16 | H          |      | 1.74                  | 29.6438 | 29.7369        | 29.601       | 29.7775          |                    |        |          |         |
| 17 | H          |      | 1.74                  | 29.8941 | 29.8252        | 29.7413      | 29.7905          |                    |        |          |         |
| 18 | H          |      | 1.82                  | 29.6032 | 29.8839        | 30.04        | 29.6797          |                    |        |          |         |
| 19 | H          |      | 1.37                  | 30.2003 | 30.0283        | 30.0918      | 30.3644          |                    |        |          |         |
| 20 | H          |      | 3.79                  | 27.8674 | 27.6199        | 26.9805      | 28.0199          |                    |        |          |         |
| 21 | H          |      | 2.2                   | 29.4315 | 29.7114        | 29.7087      | 29.7496          |                    |        |          |         |
| 22 | H          |      | 1.89                  | 29.6998 | 29.3089        | 29.4321      | 29.3797          |                    |        |          |         |
| 23 | H          |      | 2.67                  | 29.1159 | 28.8911        | 29.0569      | 28.9721          |                    |        |          |         |
| 24 | H          |      | 2.45                  | 28.7234 | 28.7933        | 28.7765      | 28.6751          |                    |        |          |         |
| 25 | H          | x    | 6.49                  | 24.67   | 24.3575        | 24.6541      | 24.4636          |                    |        |          |         |
| 26 | H          |      | 2.72                  | 28.748  | 28.7583        | 28.7269      | 28.5609          |                    |        |          |         |
| 27 | H          |      | 2.38                  | 29.1725 | 29.3492        | 29.0084      | 29.4427          |                    |        |          |         |
| 28 | H          |      | 2.27                  | 29.1655 | 29.9086        | 29.7937      | 29.7853          |                    |        |          |         |
| 29 | Main       |      | Unscaled              | Scaled  | UnscaledErrors | ScaledErrors | Detailed Results | ParametersEstimate |        |          |         |

**Table S3. Conformers and Boltzmann populations of 1 $\alpha$ 4 $\beta$ -3.**

| 1 $\alpha$ 4 $\beta$ -3a (77.42%) | 1 $\alpha$ 4 $\beta$ -3b (5.85%) | 1 $\alpha$ 4 $\beta$ -3c (8.60%) |
|-----------------------------------|----------------------------------|----------------------------------|
| C 2.29845 -0.99679 -0.25609       | C 2.327191 -0.98196 -0.28065     | C 2.659039 -0.5951 -0.25563      |
| C 3.864988 -0.97178 -0.19503      | C 3.893207 -0.93415 -0.11696     | C 4.115967 -0.21449 0.192898     |
| C 4.411762 -0.84589 1.235718      | C 4.3639 -0.8582 1.344544        | C 4.305839 -0.15357 1.717396     |
| C 4.486001 0.097133 -1.10372      | C 4.548845 0.176278 -0.94914     | C 4.60545 1.086807 -0.45878      |
| C 1.724334 0.298536 0.297493      | C 1.71965 0.298678 0.250324      | C 1.668406 0.459376 0.186559     |
| C 1.775316 -2.23026 0.548964      | C 1.7781 -2.23218 0.473047       | C 2.27774 -1.98227 0.332876      |
| O 2.00165 -1.14247 -1.65207       | O 2.023411 -1.05861 -1.6827      | O 2.62201 -0.64957 -1.69162      |
| C 1.324536 1.347002 -0.42992      | C 1.288565 1.333414 -0.47711     | C 1.084365 1.363372 -0.60231     |
| C 0.913675 2.699279 0.129128      | C 0.889787 2.68604 0.091931      | C 0.081582 2.410135 -0.14715     |
| C 0.545782 -2.96357 -0.02486      | C 0.545404 -2.9315 -0.13135      | C 1.132254 -2.7528 -0.35532      |
| C -0.76094 -2.19016 -0.1574       | C -0.76701 -2.16516 -0.2144      | C -0.2673 -2.14973 -0.37892      |
| C -1.29298 -1.70871 1.166698      | C -1.28218 -1.73977 1.12968      | C -0.74892 -1.62504 0.935735     |
| O -2.22414 -0.73219 1.312611      | O -2.22238 -0.77708 1.320144     | O -1.5533 -0.50645 0.956014      |
| C -3.01807 -0.05115 0.29991       | C -3.03297 -0.07586 0.335746     | C -2.92397 -0.39373 0.428355     |
| C -3.61788 -1.05966 -0.69201      | C -3.64427 -1.06502 -0.66906     | C -3.28652 -1.60087 -0.45167     |
| C -2.68242 -1.55766 -1.78907      | C -2.72074 -1.5162 -1.79588      | C -2.46154 -1.89634 -1.70727     |
| C -1.37036 -2.13819 -1.35912      | C -1.3881 -2.07405 -1.4051       | C -1.01223 -2.22496 -1.49579     |
| O -0.85304 -2.18969 2.192785      | O -0.81951 -2.24127 2.137402     | O -0.30894 -2.03672 1.986711     |
| C -2.13413 1.02614 -0.39377       | C -2.16735 1.017702 -0.35509     | C -3.03409 0.985499 -0.30624     |
| C -1.59321 2.106248 0.547981      | C -1.59701 2.075853 0.59339      | C -1.91279 1.245401 -1.37123     |
| C -0.57114 3.044437 -0.12381      | C -0.60379 3.028479 -0.10048     | C -1.07175 2.522336 -1.17819     |
| C 1.797851 3.784021 -0.52166      | C 1.743663 3.771629 -0.59742     | C 0.772769 3.773805 0.004013     |
| O 1.069622 2.754117 1.552337      | O 1.102988 2.749178 1.508376     | O -0.44441 2.103308 1.160904     |
| O -2.84661 1.600276 -1.498        | O -2.9151 1.621697 -1.42101      | O -3.18664 2.059769 0.604446     |
| C -4.15369 0.568738 1.124246      | C -4.1555 0.523321 1.192723      | C -3.83253 -0.40591 1.664918     |
| H 4.166508 -1.95282 -0.58959      | H 4.242996 -1.90077 -0.51961     | H 4.75137 -1.03632 -0.18137      |
| H 5.503271 -0.94393 1.228357      | H 3.95074 -1.66135 1.962308      | H 4.039439 -1.09187 2.213331     |
| H 4.016314 -1.61317 1.909131      | H 4.083379 0.097663 1.802426     | H 3.704022 0.647964 2.160892     |
| H 4.177189 0.134646 1.667749      | H 5.456418 -0.9323 1.391202      | H 5.354957 0.057809 1.953902     |
| H 4.251884 1.108486 -0.75207      | H 4.303423 1.167141 -0.55195     | H 4.056622 1.951651 -0.07103     |
| H 4.124257 0.000802 -2.13001      | H 4.216977 0.145883 -1.99063     | H 4.47142 1.066985 -1.54403      |
| H 5.57753 -0.00806 -1.11028       | H 5.639635 0.068219 -0.93025     | H 5.66964 1.239504 -0.24487      |
| H 1.686556 0.369549 1.383245      | H 1.703942 0.377894 1.335573     | H 1.447906 0.458014 1.252236     |
| H 2.574648 -2.98108 0.58453       | H 2.570895 -2.99349 0.50159      | H 3.163451 -2.63183 0.26864      |
| H 1.569993 -1.94504 1.584287      | H 1.566726 -1.97635 1.5147       | H 2.052293 -1.88142 1.3976       |

|                              |                              |                              |
|------------------------------|------------------------------|------------------------------|
| H 1.036178 -1.08407 -1.73819 | H 2.561275 -1.77704 -2.05244 | H 3.37581 -1.19216 -1.97405  |
| H 1.360022 1.28131 -1.51718  | H 1.284965 1.254164 -1.56261 | H 1.321696 1.366629 -1.66407 |
| H 0.806653 -3.36747 -1.00798 | H 0.791816 -3.28457 -1.13746 | H 1.414718 -2.96245 -1.39151 |
| H 0.358513 -3.81791 0.635671 | H 0.37027 -3.82192 0.484891  | H 1.066494 -3.72125 0.159533 |
| H -3.998 -1.90378 -0.10256   | H -3.99957 -1.93005 -0.09447 | H -3.26518 -2.49252 0.189913 |
| H -4.48342 -0.59307 -1.17264 | H -4.52641 -0.59817 -1.11855 | H -4.33502 -1.47207 -0.74644 |
| H -2.48648 -0.74147 -2.49916 | H -2.55552 -0.67945 -2.48943 | H -2.54713 -1.08336 -2.44006 |
| H -3.20734 -2.32303 -2.37956 | H -3.24008 -2.27929 -2.39504 | H -2.9193 -2.7645 -2.20537   |
| H -0.83199 -2.62036 -2.17766 | H -0.8358 -2.48389 -2.25092  | H -0.52099 -2.63868 -2.37692 |
| H -1.28663 0.512652 -0.85328 | H -1.33463 0.517456 -0.85415 | H -3.99894 0.942318 -0.82692 |
| H -2.44 2.706226 0.910311    | H -2.43005 2.666052 1.001116 | H -1.22742 0.396019 -1.41988 |
| H -1.14949 1.642653 1.433828 | H -1.11925 1.5932 1.45094    | H -2.39446 1.313869 -2.35377 |
| H -0.71371 4.062969 0.255838 | H -0.73445 4.041592 0.297746 | H -1.71859 3.358465 -0.8931  |
| H -0.75493 3.082676 -1.20399 | H -0.82804 3.079807 -1.17226 | H -0.62446 2.78382 -2.14586  |
| H 2.857713 3.593034 -0.3135  | H 2.811789 3.587688 -0.42781 | H 1.565064 3.707946 0.755127 |
| H 1.537452 4.768147 -0.11817 | H 1.493449 4.756955 -0.19024 | H 0.047971 4.529864 0.325964 |
| H 1.672098 3.806265 -1.61007 | H 1.577197 3.786475 -1.68044 | H 1.214307 4.097146 -0.94465 |
| H 1.998098 2.547948 1.747925 | H 2.039009 2.544886 1.66618  | H -0.62276 1.141867 1.19828  |
| H -3.45917 2.262754 -1.14003 | H -3.52622 2.262395 -1.0231  | H -2.30357 2.256786 0.985604 |
| H -3.76133 1.134268 1.972389 | H -3.74948 1.075393 2.043528 | H -3.55657 0.398601 2.346038 |
| H -4.80432 -0.21928 1.51582  | H -4.79417 -0.27547 1.582373 | H -3.74515 -1.36469 2.186092 |
| H -4.76517 1.233341 0.503403 | H -4.78292 1.195667 0.5966   | H -4.87817 -0.25636 1.373564 |

### 1 $\alpha$ 4 $\beta$ -3d (5.23%)

|                              |
|------------------------------|
| C -2.56178 -0.53948 0.5285   |
| C -3.85524 -0.87769 -0.28463 |
| C -4.80464 0.331809 -0.35843 |
| C -4.60741 -2.09856 0.266032 |
| C -1.82131 0.602545 -0.1472  |
| C -1.62104 -1.75834 0.700643 |
| O -2.9017 -0.20386 1.884923  |
| C -1.15362 1.573859 0.481498 |
| C -0.44492 2.725883 -0.21666 |
| C -0.96559 -2.34509 -0.58793 |
| C 0.541178 -2.16042 -0.61322 |
| C 1.059529 -0.96574 -1.33319 |
| O 2.367793 -0.61085 -1.19877 |
| C 3.038144 -0.34642 0.07881  |

### 1 $\alpha$ 4 $\beta$ -3e (2.90%)

|                              |
|------------------------------|
| C 2.695519 -0.17633 -0.25839 |
| C 4.071574 0.443478 0.188795 |
| C 5.283423 -0.35453 -0.32239 |
| C 4.195139 0.688051 1.701759 |
| C 1.575136 0.764013 0.159437 |
| C 2.481491 -1.58168 0.349555 |
| O 2.718948 -0.35213 -1.68237 |
| C 0.83769 1.512804 -0.66267  |
| C -0.27012 2.463405 -0.23531 |
| C 1.433448 -2.49681 -0.31749 |
| C -0.03196 -2.07848 -0.3387  |
| C -0.56737 -1.58389 0.966415 |
| O -1.5065 -0.57319 0.961093  |
| C -2.88752 -0.65971 0.458117 |

|                              |                              |
|------------------------------|------------------------------|
| C 3.161165 -1.61883 0.95808  | C -3.09872 -1.93098 -0.38089 |
| C 2.852854 -2.90698 0.171274 | C -2.25617 -2.15692 -1.63967 |
| C 1.368928 -3.05279 -0.03659 | C -0.77303 -2.28314 -1.44207 |
| O 0.377101 -0.34665 -2.13449 | O -0.07594 -1.90707 2.025014 |
| C 2.215669 0.761123 0.788899 | C -3.18899 0.669362 -0.31359 |
| C 2.108952 2.068911 -0.01116 | C -2.12659 1.040317 -1.40519 |
| C 0.963751 3.015643 0.395438 | C -1.43917 2.410901 -1.25214 |
| C -1.30766 3.991988 -0.05258 | C 0.269374 3.899078 -0.14354 |
| O -0.34601 2.527396 -1.62276 | O -0.7432 2.149801 1.09075   |
| O 2.851978 0.965401 2.052992 | O -3.46821 1.743716 0.566802 |
| C 4.427006 0.132551 -0.34464 | C -3.76933 -0.75403 1.710421 |
| H -3.53273 -1.10306 -1.31126 | H 4.096914 1.431093 -0.30127 |
| H -5.64939 0.115365 -1.02137 | H 6.196688 0.240863 -0.20806 |
| H -4.30315 1.228938 -0.73679 | H 5.173839 -0.61964 -1.3775  |
| H -5.22465 0.56524 0.628808  | H 5.429737 -1.28083 0.244991 |
| H -4.81271 -1.97201 1.334637 | H 5.162379 1.152437 1.925827 |
| H -4.04653 -3.02986 0.13566  | H 4.146662 -0.25093 2.265268 |
| H -5.56534 -2.22118 -0.25229 | H 3.41571 1.353911 2.084053  |
| H -1.8319 0.597246 -1.23359  | H 1.39301 0.826405 1.230588  |
| H -0.84106 -1.43844 1.398694 | H 3.428926 -2.12827 0.291488 |
| H -2.18141 -2.5414 1.220489  | H 2.245723 -1.47513 1.411599 |
| H -3.35792 0.652565 1.857122 | H 3.005757 0.489678 -2.07231 |
| H -1.13963 1.594636 1.571921 | H 1.004424 1.449453 -1.73747 |
| H -1.18308 -3.41736 -0.64045 | H 1.739549 -2.68853 -1.3498  |
| H -1.39179 -1.89564 -1.48781 | H 1.491429 -3.45577 0.216121 |
| H 4.176964 -1.66541 1.364585 | H -2.9533 -2.79129 0.286778  |
| H 2.490864 -1.55186 1.820067 | H -4.15839 -1.94994 -0.66305 |
| H 3.224031 -3.77285 0.72876  | H -2.45953 -1.38932 -2.39788 |
| H 3.386482 -2.89333 -0.78801 | H -2.60011 -3.09525 -2.10084 |
| H 0.908275 -3.94152 0.395413 | H -0.2411 -2.65562 -2.31799  |
| H 1.208151 0.34633 0.952498  | H -4.14693 0.484474 -0.81543 |
| H 3.06114 2.598851 0.112534  | H -1.34706 0.276594 -1.45277 |
| H 2.01627 1.8502 -1.0788     | H -2.63082 1.032693 -2.37877 |
| H 1.242021 4.023394 0.065679 | H -2.17666 3.17258 -0.97904  |
| H 0.871257 3.074827 1.491816 | H -1.0366 2.699051 -2.23219  |
| H -2.30372 3.818323 -0.46978 | H 0.6583 4.235642 -1.11072   |
| H -0.84618 4.827718 -0.58962 | H 1.075519 3.946865 0.593984 |
| H -1.41125 4.268122 1.002907 | H -0.52929 4.58232 0.165959  |



|                              |                              |
|------------------------------|------------------------------|
| H -0.00288 1.631365 -1.80473 | H -0.80328 1.175604 1.166996 |
| H 2.361265 1.659285 2.519683 | H -2.61437 2.061771 0.931773 |
| H 4.361998 0.932898 -1.08546 | H -3.59522 0.101586 2.362361 |
| H 4.991744 -0.69528 -0.78668 | H -3.5461 -1.67505 2.258419  |
| H 4.96783 0.49861 0.532571   | H -4.82958 -0.75598 1.433764 |

**Table S4. Conformer and Boltzmann population of 1 $\beta$ 4 $\alpha$ -3.**

**1 $\beta$ 4 $\alpha$ -3a (100%)**

|   |          |          |          |
|---|----------|----------|----------|
| C | -2.44679 | -0.86718 | -0.20796 |
| C | -3.97219 | -0.61058 | 0.068856 |
| C | -4.5296  | 0.571647 | -0.73517 |
| C | -4.31524 | -0.45252 | 1.558577 |
| C | -1.61    | 0.3014   | 0.306707 |
| C | -2.03459 | -2.19583 | 0.495357 |
| O | -2.36283 | -1.00156 | -1.62152 |
| C | -1.22682 | 1.357991 | -0.4157  |
| C | -0.48611 | 2.577751 | 0.106744 |
| C | -0.77666 | -2.93137 | -0.0198  |
| C | 0.559399 | -2.21277 | 0.162294 |
| C | 1.097341 | -1.59734 | -1.09311 |
| O | 2.355452 | -1.11763 | -1.20864 |
| C | 3.066314 | -0.30589 | -0.22019 |
| C | 3.461384 | -1.16317 | 0.986974 |
| C | 2.337138 | -1.53127 | 1.950819 |
| C | 1.112812 | -2.19267 | 1.391724 |
| O | 0.418874 | -1.59163 | -2.11301 |
| C | 2.130868 | 0.873599 | 0.144922 |
| C | 1.719681 | 1.73135  | -1.06229 |
| C | 0.778291 | 2.900059 | -0.72177 |
| C | -1.43137 | 3.794887 | 0.088872 |
| O | -0.01424 | 2.390525 | 1.462176 |
| O | 2.771202 | 1.64422  | 1.159776 |
| C | 4.332489 | 0.141766 | -0.95258 |
| H | -4.46984 | -1.51772 | -0.30198 |
| H | -4.30597 | 0.461033 | -1.79845 |
| H | -5.61822 | 0.624202 | -0.61294 |
| H | -4.11119 | 1.524812 | -0.39185 |
| H | -5.39826 | -0.33785 | 1.682062 |

|   |          |          |          |
|---|----------|----------|----------|
| H | -4.00791 | -1.3148  | 2.159438 |
| H | -3.84458 | 0.442682 | 1.983988 |
| H | -1.34425 | 0.256432 | 1.362509 |
| H | -1.91974 | -2.01467 | 1.571811 |
| H | -2.86989 | -2.89924 | 0.385277 |
| H | -1.43428 | -1.19517 | -1.8631  |
| H | -1.49165 | 1.390911 | -1.47182 |
| H | -0.72454 | -3.8814  | 0.525737 |
| H | -0.91388 | -3.18514 | -1.07219 |
| H | 3.929086 | -2.07419 | 0.593838 |
| H | 4.228343 | -0.62266 | 1.550484 |
| H | 2.013096 | -0.62679 | 2.488909 |
| H | 2.74702  | -2.18899 | 2.729464 |
| H | 0.530825 | -2.71049 | 2.157412 |
| H | 1.220631 | 0.432052 | 0.560358 |
| H | 1.249648 | 1.084526 | -1.81058 |
| H | 2.614783 | 2.158167 | -1.52883 |
| H | 1.325866 | 3.674139 | -0.17038 |
| H | 0.457189 | 3.360009 | -1.66423 |
| H | -1.83746 | 3.968095 | -0.91333 |
| H | -2.27948 | 3.631337 | 0.765179 |
| H | -0.89566 | 4.694875 | 0.410318 |
| H | -0.78787 | 2.262633 | 2.033874 |
| H | 2.044742 | 2.119612 | 1.602259 |
| H | 4.094257 | 0.546079 | -1.93878 |
| H | 4.840419 | 0.911832 | -0.36445 |
| H | 5.013033 | -0.70494 | -1.08996 |

**Table S5. Conformers and Boltzmann populations of 1 $\alpha$ 4 $\alpha$ -3.**

| <b>1<math>\alpha</math>4<math>\alpha</math>-3a (27.46%)</b> | <b>1<math>\alpha</math>4<math>\alpha</math>-3b (13.96%)</b> | <b>1<math>\alpha</math>4<math>\alpha</math>-3c (34.39%)</b> |
|-------------------------------------------------------------|-------------------------------------------------------------|-------------------------------------------------------------|
| C -2.57091 -0.66625 0.232318                                | C -2.47701 -0.83469 0.292251                                | C -2.57129 -0.67029 0.244721                                |
| C -3.81864 -0.18714 -0.59337                                | C -3.92162 -0.76922 -0.32883                                | C -3.77774 -0.22526 -0.65458                                |
| C -4.59055 0.923643 0.140543                                | C -3.96014 -0.93196 -1.85733                                | C -4.61454 0.883529 0.013876                                |
| C -4.80175 -1.31707 -0.95693                                | C -4.68679 0.492448 0.095609                                | C -4.71594 -1.38253 -1.04104                                |
| C -1.58863 0.471869 0.480945                                | C -1.65095 0.339977 -0.1885                                 | C -1.57496 0.464419 0.480085                                |
| C -1.87539 -1.87916 -0.45218                                | C -1.82254 -2.19848 -0.07471                                | C -1.87739 -1.92435 -0.34482                                |
| O -2.99395 -1.04338 1.561184                                | O -2.59489 -0.71624 1.719395                                | O -3.06468 -1.09639 1.532934                                |
| C -1.30377 1.492174 -0.33285                                | C -1.27712 1.373699 0.567927                                | C -1.34509 1.535789 -0.28674                                |

|   |          |          |          |   |          |          |          |   |          |          |          |
|---|----------|----------|----------|---|----------|----------|----------|---|----------|----------|----------|
| C | -0.3939  | 2.667907 | -0.01675 | C | -0.55886 | 2.643333 | 0.152664 | C | -0.40219 | 2.686726 | 0.022267 |
| C | -0.81913 | -2.64858 | 0.376491 | C | -0.67228 | -2.70497 | 0.822565 | C | -0.80798 | -2.63059 | 0.521663 |
| C | 0.586618 | -2.07315 | 0.446024 | C | 0.687529 | -2.03194 | 0.695016 | C | 0.602619 | -2.06105 | 0.522516 |
| C | 1.266957 | -2.05298 | -0.89711 | C | 1.261748 | -2.13263 | -0.69028 | C | 1.239858 | -2.0861  | -0.84189 |
| O | 2.358135 | -1.3055  | -1.19118 | O | 2.217852 | -1.30689 | -1.17736 | O | 2.295398 | -1.31687 | -1.20753 |
| C | 3.072813 | -0.36789 | -0.3309  | C | 2.95736  | -0.25532 | -0.48386 | C | 3.048608 | -0.36829 | -0.39421 |
| C | 3.525291 | -1.08225 | 0.952779 | C | 3.582458 | -0.82607 | 0.799541 | C | 3.558471 | -1.06547 | 0.877928 |
| C | 2.463664 | -1.23558 | 2.039232 | C | 2.645263 | -0.92979 | 2.001833 | C | 2.548828 | -1.19991 | 2.015804 |
| C | 1.125091 | -1.78348 | 1.64567  | C | 1.304215 | -1.57044 | 1.798635 | C | 1.189961 | -1.74448 | 1.691881 |
| O | 0.81913  | -2.73478 | -1.80092 | O | 0.831995 | -2.97669 | -1.45605 | O | 0.78266  | -2.81852 | -1.69938 |
| C | 2.159277 | 0.849547 | -0.05159 | C | 2.023472 | 0.948684 | -0.20274 | C | 2.150007 | 0.854197 | -0.09001 |
| C | 1.61436  | 1.539733 | -1.31105 | C | 1.232143 | 1.43164  | -1.4252  | C | 1.555004 | 1.536235 | -1.33147 |
| C | 0.778822 | 2.798168 | -1.01724 | C | 0.261954 | 2.606517 | -1.15583 | C | 0.741249 | 2.803513 | -1.01393 |
| C | -1.22654 | 3.965943 | -0.04211 | C | -1.58426 | 3.792448 | 0.079167 | C | -1.20443 | 4.003516 | 0.042725 |
| O | 0.210975 | 2.54922  | 1.288541 | O | 0.405633 | 2.994494 | 1.191007 | O | 0.240397 | 2.533582 | 1.305805 |
| O | 2.901741 | 1.751197 | 0.771783 | O | 2.843299 | 1.973106 | 0.354677 | O | 2.927286 | 1.76297  | 0.693625 |
| C | 4.304949 | 0.006334 | -1.15907 | C | 4.066467 | 0.10106  | -1.47771 | C | 4.242465 | -0.00723 | -1.28233 |
| H | -3.43692 | 0.219098 | -1.54027 | H | -4.44847 | -1.63805 | 0.101668 | H | -3.35286 | 0.182408 | -1.58181 |
| H | -5.42027 | 1.282843 | -0.47886 | H | -3.48446 | -1.85734 | -2.19525 | H | -5.35456 | 1.276752 | -0.69152 |
| H | -3.95326 | 1.777767 | 0.381448 | H | -3.46719 | -0.09259 | -2.36183 | H | -4.00486 | 1.723429 | 0.359674 |
| H | -5.00454 | 0.543712 | 1.080163 | H | -5.00007 | -0.95032 | -2.203   | H | -5.17546 | 0.486935 | 0.870448 |
| H | -5.14914 | -1.858   | -0.06573 | H | -4.65338 | 0.6329   | 1.179538 | H | -5.01717 | -1.94676 | -0.1514  |
| H | -5.69327 | -0.89074 | -1.42977 | H | -4.26366 | 1.388883 | -0.37094 | H | -5.62293 | -0.98655 | -1.51222 |
| H | -4.3829  | -2.04633 | -1.6555  | H | -5.73645 | 0.419078 | -0.21171 | H | -4.25999 | -2.07765 | -1.75122 |
| H | -1.09087 | 0.402214 | 1.445791 | H | -1.40302 | 0.31371  | -1.24677 | H | -1.00208 | 0.342158 | 1.398078 |
| H | -2.65486 | -2.61158 | -0.69152 | H | -2.61453 | -2.96045 | -0.02325 | H | -2.66209 | -2.6677  | -0.50678 |
| H | -1.45258 | -1.56751 | -1.41268 | H | -1.4876  | -2.18937 | -1.11528 | H | -1.46809 | -1.67999 | -1.32997 |
| H | -3.55931 | -1.82728 | 1.471052 | H | -3.20941 | -1.40849 | 2.011373 | H | -3.47966 | -0.32806 | 1.954948 |
| H | -1.79154 | 1.569632 | -1.30446 | H | -1.5715  | 1.354472 | 1.618405 | H | -1.89245 | 1.666524 | -1.21963 |
| H | -1.19941 | -2.77303 | 1.395033 | H | -0.98633 | -2.65156 | 1.869114 | H | -1.17352 | -2.68714 | 1.550842 |
| H | -0.7415  | -3.64569 | -0.06986 | H | -0.5384  | -3.76439 | 0.57405  | H | -0.74094 | -3.65672 | 0.143543 |
| H | 3.909598 | -2.06478 | 0.651192 | H | 3.99221  | -1.81188 | 0.545898 | H | 3.925629 | -2.05344 | 0.572693 |
| H | 4.366977 | -0.52648 | 1.377435 | H | 4.428069 | -0.19152 | 1.081936 | H | 4.420897 | -0.50682 | 1.25444  |
| H | 2.2904   | -0.25531 | 2.508458 | H | 2.470814 | 0.078472 | 2.406994 | H | 2.404138 | -0.21286 | 2.480338 |
| H | 2.866526 | -1.86502 | 2.84651  | H | 3.16095  | -1.46922 | 2.810483 | H | 2.987015 | -1.82212 | 2.810288 |
| H | 0.467447 | -1.94343 | 2.50175  | H | 0.731526 | -1.65396 | 2.723528 | H | 0.566867 | -1.87939 | 2.577833 |
| H | 1.299213 | 0.485536 | 0.510744 | H | 1.290427 | 0.628412 | 0.54161  | H | 1.314272 | 0.496853 | 0.510989 |
| H | 1.016085 | 0.817149 | -1.87699 | H | 0.687257 | 0.578043 | -1.83787 | H | 0.929494 | 0.812264 | -1.86509 |

|                              |                              |                              |
|------------------------------|------------------------------|------------------------------|
| H 2.442742 1.843631 -1.96134 | H 1.92645 1.759893 -2.20751  | H 2.356963 1.830293 -2.01831 |
| H 1.432136 3.591883 -0.6349  | H 0.828109 3.545544 -1.16221 | H 1.414824 3.590489 -0.65321 |
| H 0.369019 3.165827 -1.9661  | H -0.437 2.672052 -1.99843   | H 0.305601 3.174663 -1.94981 |
| H -0.58008 4.829805 0.14581  | H -2.12 3.893419 1.030927    | H -0.5337 4.848404 0.231011  |
| H -1.72258 4.105312 -1.00875 | H -1.07319 4.738887 -0.12849 | H -1.72113 4.173594 -0.90801 |
| H -2.0047 3.938598 0.730552  | H -2.32675 3.608242 -0.70424 | H -1.96369 3.979804 0.834503 |
| H -0.50223 2.481623 1.943854 | H -0.02991 2.899172 2.05302  | H -0.45357 2.470674 1.981625 |
| H 2.22366 2.268025 1.242824  | H 2.214404 2.562742 0.813487 | H 2.270861 2.280823 1.192508 |
| H 4.022498 0.291341 -2.17548 | H 3.651589 0.299535 -2.46938 | H 3.914606 0.263263 -2.28908 |
| H 4.825652 0.843109 -0.68527 | H 4.600433 0.989227 -1.13124 | H 4.784921 0.835615 -0.84488 |
| H 4.987934 -0.84675 -1.22749 | H 4.771686 -0.73153 -1.56931 | H 4.921 -0.86213 -1.36917    |

### 1 $\alpha$ 4 $\alpha$ -3d (21.55%)

|                              |
|------------------------------|
| C -2.42647 -0.87913 0.257896 |
| C -3.92245 -0.80503 -0.20246 |
| C -4.09166 -0.86174 -1.729   |
| C -4.66473 0.407702 0.375822 |
| C -1.64342 0.321164 -0.25909 |
| C -1.80487 -2.2236 -0.23251  |
| O -2.49539 -0.86494 1.69097  |
| C -1.31955 1.381679 0.485402 |
| C -0.61394 2.663207 0.085324 |
| C -0.65033 -2.82533 0.601234 |
| C 0.689829 -2.10199 0.583196 |
| C 1.318922 -2.09053 -0.78547 |
| O 2.299397 -1.24201 -1.16855 |
| C 2.975177 -0.20364 -0.3957  |
| C 3.538052 -0.80551 0.90136  |
| C 2.538259 -0.99226 2.041168 |
| C 1.243993 -1.68875 1.739231 |
| O 0.922104 -2.87706 -1.62553 |
| C 2.000445 0.973536 -0.13658 |
| C 1.267094 1.461466 -1.39434 |
| C 0.272464 2.626754 -1.17894 |
| C -1.65723 3.788702 -0.05382 |
| O 0.293902 3.043252 1.163872 |
| O 2.768323 1.99897 0.485948  |
| C 4.134959 0.206248 -1.30847 |

### 1 $\alpha$ 4 $\alpha$ -3e (2.10%)

|                              |
|------------------------------|
| C -2.577 -0.31048 0.259264   |
| C -3.97454 0.045743 -0.37801 |
| C -5.12779 -0.79586 0.196804 |
| C -4.00376 -0.00444 -1.91481 |
| C -1.56348 0.726077 -0.21064 |
| C -2.14824 -1.7533 -0.10491  |
| O -2.71032 -0.2725 1.687611  |
| C -0.96137 1.617115 0.579388 |
| C -0.0614 2.774628 0.184689  |
| C -1.1049 -2.44482 0.801264  |
| C 0.35217 -2.0197 0.681259   |
| C 0.907423 -2.21603 -0.70176 |
| O 1.99385 -1.56488 -1.18347  |
| C 2.903701 -0.6643 -0.48194  |
| C 3.415651 -1.34418 0.798666 |
| C 2.471262 -1.2911 1.999203  |
| C 1.037503 -1.68059 1.788854 |
| O 0.344006 -2.97194 -1.47235 |
| C 2.19501 0.683015 -0.19364  |
| C 1.489193 1.298135 -1.4093  |
| C 0.741318 2.621777 -1.1272  |
| C -0.90059 4.066506 0.127076 |
| O 0.948226 2.960743 1.219622 |
| O 3.183016 1.549808 0.359334 |
| C 4.060575 -0.50036 -1.47185 |

|                              |                              |
|------------------------------|------------------------------|
| H -4.38326 -1.70667 0.225176 | H -4.15442 1.093305 -0.083   |
| H -3.66974 0.027603 -2.21274 | H -5.08333 -0.85199 1.287682 |
| H -5.15719 -0.89322 -1.98316 | H -5.11753 -1.82007 -0.19235 |
| H -3.62167 -1.74432 -2.17398 | H -6.08853 -0.35159 -0.08798 |
| H -5.73028 0.345348 0.125135 | H -3.27984 0.675047 -2.37514 |
| H -4.57031 0.446944 1.463717 | H -3.80289 -1.01567 -2.28596 |
| H -4.28112 1.347867 -0.03671 | H -4.99693 0.284875 -2.277   |
| H -1.37158 0.284389 -1.31187 | H -1.37718 0.740982 -1.28198 |
| H -2.60523 -2.97398 -0.22248 | H -3.04389 -2.38214 -0.0654  |
| H -1.47912 -2.13246 -1.2726  | H -1.80197 -1.77846 -1.14177 |
| H -1.58016 -0.86687 2.014323 | H -3.16467 0.556298 1.911555 |
| H -1.65226 1.376689 1.526024 | H -1.164 1.560151 1.651217   |
| H -0.9804 -2.94073 1.6396    | H -1.41865 -2.34095 1.843154 |
| H -0.48674 -3.83442 0.208356 | H -1.15215 -3.5111 0.550194  |
| H 3.997124 -1.7661 0.636154  | H 3.646698 -2.3847 0.538147  |
| H 4.341691 -0.15503 1.259743 | H 4.358895 -0.87003 1.086911 |
| H 2.293103 -0.0079 2.468608  | H 2.478759 -0.27211 2.415157 |
| H 3.031845 -1.5358 2.860257  | H 2.881046 -1.92188 2.802361 |
| H 0.652355 -1.88007 2.637869 | H 0.455645 -1.66699 2.711752 |
| H 1.235009 0.62083 0.560805  | H 1.423322 0.492506 0.555981 |
| H 0.751553 0.606456 -1.84022 | H 0.797633 0.554299 -1.81462 |
| H 1.998528 1.798289 -2.13792 | H 2.221635 1.501607 -2.19918 |
| H 0.826221 3.572807 -1.16311 | H 1.460983 3.448952 -1.12001 |
| H -0.38389 2.67715 -2.05594  | H 0.064808 2.818736 -1.96763 |
| H -1.15702 4.742483 -0.25406 | H -1.40582 4.242703 1.085199 |
| H -2.24003 3.89324 0.869812  | H -0.25448 4.926199 -0.0814  |
| H -2.35854 3.575692 -0.86703 | H -1.67035 4.000908 -0.64867 |
| H -0.20582 3.043407 1.995878 | H 0.503054 2.971355 2.081835 |
| H 2.106294 2.583419 0.903195 | H 2.670192 2.233519 0.830594 |
| H 3.777325 0.42776 -2.3172   | H 3.689148 -0.22252 -2.46173 |
| H 4.62757 1.093007 -0.90277  | H 4.74299 0.275831 -1.11726  |
| H 4.861805 -0.60928 -1.38196 | H 4.607085 -1.44393 -1.5713  |

**Table S6. Conformers and Boltzmann populations of 1 $\beta$ 4 $\beta$ -3.**

| 1 $\beta$ 4 $\beta$ -3a (5.47%) |          |          |          | 1 $\beta$ 4 $\beta$ -3b (94.53%) |          |          |          |
|---------------------------------|----------|----------|----------|----------------------------------|----------|----------|----------|
| C                               | -2.47035 | -0.86212 | -0.2012  | C                                | 2.520096 | -0.64194 | 0.275582 |
| C                               | -4.0005  | -0.611   | 0.058619 | C                                | 4.006418 | -0.18438 | 0.027139 |
| C                               | -4.54383 | 0.57903  | -0.74375 | C                                | 4.224002 | 0.520089 | -1.31891 |
| C                               | -4.37227 | -0.47128 | 1.543314 | C                                | 5.014277 | -1.33334 | 0.201119 |
| C                               | -1.65679 | 0.317141 | 0.318589 | C                                | 1.69238  | 0.617211 | 0.527143 |
| C                               | -2.05319 | -2.17908 | 0.521542 | C                                | 2.008737 | -1.53511 | -0.89017 |
| O                               | -2.37926 | -1.01263 | -1.61137 | O                                | 2.587609 | -1.38698 | 1.490328 |
| C                               | -1.18281 | 1.331771 | -0.41339 | C                                | 1.062128 | 1.412269 | -0.34504 |
| C                               | -0.53224 | 2.599743 | 0.115752 | C                                | 0.486908 | 2.785281 | -0.01617 |
| C                               | -0.79508 | -2.91719 | 0.010891 | C                                | 0.920606 | -2.58828 | -0.56357 |
| C                               | 0.545968 | -2.20207 | 0.174437 | C                                | -0.51934 | -2.10524 | -0.41896 |
| C                               | 1.061879 | -1.5831  | -1.08741 | C                                | -0.8813  | -1.64294 | 0.962202 |
| O                               | 2.310522 | -1.08192 | -1.22523 | O                                | -2.01503 | -0.988   | 1.28731  |
| C                               | 3.082065 | -0.33134 | -0.24435 | C                                | -3.04182 | -0.42939 | 0.41741  |
| C                               | 3.492497 | -1.23272 | 0.926084 | C                                | -3.62207 | -1.52152 | -0.49069 |
| C                               | 2.393281 | -1.59517 | 1.921499 | C                                | -2.77949 | -1.88691 | -1.70767 |
| C                               | 1.131964 | -2.20747 | 1.388942 | C                                | -1.33895 | -2.22699 | -1.48311 |
| O                               | 0.377237 | -1.58701 | -2.10181 | O                                | -0.13122 | -1.87727 | 1.900261 |
| C                               | 2.226353 | 0.894018 | 0.200137 | C                                | -2.42311 | 0.75968  | -0.37188 |
| C                               | 1.74877  | 1.770105 | -0.96375 | C                                | -1.90453 | 1.905454 | 0.502279 |
| C                               | 0.803698 | 2.929884 | -0.60316 | C                                | -1.02914 | 2.899146 | -0.28799 |
| C                               | -0.37647 | 2.644608 | 1.643763 | C                                | 1.22946  | 3.840963 | -0.86325 |
| O                               | -1.38645 | 3.704391 | -0.27524 | O                                | 0.633417 | 3.106329 | 1.370885 |
| O                               | 2.923126 | 1.63462  | 1.20454  | O                                | -3.3512  | 1.227531 | -1.3578  |
| C                               | 4.335656 | 0.076448 | -1.02507 | C                                | -4.11755 | 0.024588 | 1.410178 |
| H                               | -4.48869 | -1.51544 | -0.33138 | H                                | 4.213601 | 0.542487 | 0.825712 |
| H                               | -5.63451 | 0.631768 | -0.64189 | H                                | 4.093398 | -0.16861 | -2.16249 |
| H                               | -4.29811 | 0.4808   | -1.8032  | H                                | 5.247553 | 0.908389 | -1.37542 |
| H                               | -4.13067 | 1.528934 | -0.38446 | H                                | 3.540739 | 1.363173 | -1.46027 |
| H                               | -5.45885 | -0.36981 | 1.646198 | H                                | 4.916506 | -2.08825 | -0.58903 |
| H                               | -4.06816 | -1.33707 | 2.140868 | H                                | 4.882447 | -1.82894 | 1.164118 |
| H                               | -3.92055 | 0.423493 | 1.989053 | H                                | 6.036057 | -0.93866 | 0.144975 |
| H                               | -1.51925 | 0.330412 | 1.398851 | H                                | 1.722984 | 0.915979 | 1.574921 |
| H                               | -1.93598 | -1.98295 | 1.59502  | H                                | 1.673023 | -0.91183 | -1.72764 |
| H                               | -2.8851  | -2.88842 | 0.423159 | H                                | 2.864635 | -2.10816 | -1.26328 |
| H                               | -1.44974 | -1.19989 | -1.85111 | H                                | 1.672726 | -1.60068 | 1.76377  |

|   |          |          |          |   |          |          |          |
|---|----------|----------|----------|---|----------|----------|----------|
| H | -1.33747 | 1.317114 | -1.49168 | H | 1.012429 | 1.144731 | -1.40102 |
| H | -0.73869 | -3.86066 | 0.567022 | H | 0.935651 | -3.31425 | -1.38387 |
| H | -0.93752 | -3.18367 | -1.03776 | H | 1.218501 | -3.1321  | 0.335759 |
| H | 3.917139 | -2.14652 | 0.492755 | H | -3.7893  | -2.40531 | 0.137611 |
| H | 4.296355 | -0.73317 | 1.476259 | H | -4.60395 | -1.19122 | -0.84408 |
| H | 2.116944 | -0.70539 | 2.508569 | H | -2.82051 | -1.06515 | -2.438   |
| H | 2.813992 | -2.29167 | 2.659753 | H | -3.24811 | -2.73993 | -2.21966 |
| H | 0.561091 | -2.72455 | 2.162976 | H | -0.86889 | -2.64327 | -2.37575 |
| H | 1.345033 | 0.497366 | 0.709756 | H | -1.58545 | 0.365881 | -0.95288 |
| H | 2.624482 | 2.206055 | -1.4668  | H | -1.34127 | 1.507293 | 1.351209 |
| H | 1.272053 | 1.124198 | -1.70731 | H | -2.76636 | 2.43502  | 0.93265  |
| H | 1.334489 | 3.678339 | -0.00273 | H | -1.2151  | 2.788041 | -1.36299 |
| H | 0.529166 | 3.425972 | -1.54062 | H | -1.30726 | 3.927177 | -0.02938 |
| H | -1.33761 | 2.469493 | 2.141727 | H | 0.835476 | 4.839352 | -0.64487 |
| H | -0.02806 | 3.642024 | 1.927731 | H | 1.118936 | 3.648716 | -1.9367  |
| H | 0.345782 | 1.917349 | 2.024673 | H | 2.301338 | 3.833328 | -0.63148 |
| H | -2.25955 | 3.532846 | 0.114218 | H | 1.577682 | 3.037879 | 1.586459 |
| H | 3.515306 | 2.259729 | 0.757285 | H | -3.97757 | 1.821478 | -0.91401 |
| H | 4.074434 | 0.560634 | -1.96879 | H | -4.57738 | -0.84477 | 1.890279 |
| H | 4.950176 | 0.758707 | -0.42825 | H | -3.69097 | 0.656982 | 2.192077 |
| H | 4.939024 | -0.80696 | -1.25601 | H | -4.90651 | 0.580443 | 0.891499 |
